# Supplementary material for: Nitrogen fertilizer application rate impacts eating and cooking quality of rice after storage
Source: PubMed Central journal article supplement (PMC8213157; doi:10.1371/journal.pone.0253189), 2021-06-18
Supplement: pone.0253189.s004.pdf [file pone.0253189.s004.pdf]

# PLOS ONE

## Nitrogen fertilizer application rate impacts eating and cooking quality of rice after storage --Manuscript Draft--

|                                                                                                                                                                                                                                                                                                                                                                                                                                                                         |                                                                                                                                                                                                                                                                                                                                                                                                                                                                                                                                                                                                                                                                                                                                                                                                                                                                                                                                                                                                                                                                               |
|-------------------------------------------------------------------------------------------------------------------------------------------------------------------------------------------------------------------------------------------------------------------------------------------------------------------------------------------------------------------------------------------------------------------------------------------------------------------------|-------------------------------------------------------------------------------------------------------------------------------------------------------------------------------------------------------------------------------------------------------------------------------------------------------------------------------------------------------------------------------------------------------------------------------------------------------------------------------------------------------------------------------------------------------------------------------------------------------------------------------------------------------------------------------------------------------------------------------------------------------------------------------------------------------------------------------------------------------------------------------------------------------------------------------------------------------------------------------------------------------------------------------------------------------------------------------|
| <b>Manuscript Number:</b>                                                                                                                                                                                                                                                                                                                                                                                                                                               | PONE-D-21-06634                                                                                                                                                                                                                                                                                                                                                                                                                                                                                                                                                                                                                                                                                                                                                                                                                                                                                                                                                                                                                                                               |
| <b>Article Type:</b>                                                                                                                                                                                                                                                                                                                                                                                                                                                    | Research Article                                                                                                                                                                                                                                                                                                                                                                                                                                                                                                                                                                                                                                                                                                                                                                                                                                                                                                                                                                                                                                                              |
| <b>Full Title:</b>                                                                                                                                                                                                                                                                                                                                                                                                                                                      | Nitrogen fertilizer application rate impacts eating and cooking quality of rice after storage                                                                                                                                                                                                                                                                                                                                                                                                                                                                                                                                                                                                                                                                                                                                                                                                                                                                                                                                                                                 |
| <b>Short Title:</b>                                                                                                                                                                                                                                                                                                                                                                                                                                                     | Effect of nitrogen fertilization rate on rice quality post-storage                                                                                                                                                                                                                                                                                                                                                                                                                                                                                                                                                                                                                                                                                                                                                                                                                                                                                                                                                                                                            |
| <b>Corresponding Author:</b>                                                                                                                                                                                                                                                                                                                                                                                                                                            | Hanling Liang<br>Shenyang Agricultural University<br>Shenyang, CHINA                                                                                                                                                                                                                                                                                                                                                                                                                                                                                                                                                                                                                                                                                                                                                                                                                                                                                                                                                                                                          |
| <b>Keywords:</b>                                                                                                                                                                                                                                                                                                                                                                                                                                                        | nitrogen; fertilizer; storage; rice; eating quality; cooking quality                                                                                                                                                                                                                                                                                                                                                                                                                                                                                                                                                                                                                                                                                                                                                                                                                                                                                                                                                                                                          |
| <b>Abstract:</b>                                                                                                                                                                                                                                                                                                                                                                                                                                                        | The effect of nitrogen fertilizer application on the quality of rice during storage is not well understood. The eating and cooking quality (ECQ) of rice treated with 0 (CK, control), 160 (IN, insufficient nitrogen), 260 (AN, adequate nitrogen), and 420 (EN, excessive nitrogen) kg N/ha was analyzed over 12 months of storage. Results showed that the rate of nitrogen fertilizer application had no significant impact on the changes in taste value during storage. However, EN application significantly increased the hardness ( $p < 0.05$ ) and reduced the gumminess of rice ( $p < 0.05$ ), and delayed the decline in the viscosity of rice paste by two months after storage of one years. In conclusion, although EN application resulted in an inferior texture of rice, it delayed quality change by two months during storage. It was demonstrated that a rational nitrogen application rate (0–260 kg N/ha) for rice cultivation is particularly important to obtain high ECQ, but EN might be beneficial for the stability of the ECQ during storage. |
| <b>Order of Authors:</b>                                                                                                                                                                                                                                                                                                                                                                                                                                                | Hanling Liang<br>Dongbing Tao<br>Qi Zhang<br>Shuang Zhang<br>Jiayi Wang<br>Lifei Liu<br>Zhaoxia Wu<br>Wen Tao Sun                                                                                                                                                                                                                                                                                                                                                                                                                                                                                                                                                                                                                                                                                                                                                                                                                                                                                                                                                             |
| <b>Additional Information:</b>                                                                                                                                                                                                                                                                                                                                                                                                                                          |                                                                                                                                                                                                                                                                                                                                                                                                                                                                                                                                                                                                                                                                                                                                                                                                                                                                                                                                                                                                                                                                               |
| <b>Question</b>                                                                                                                                                                                                                                                                                                                                                                                                                                                         | <b>Response</b>                                                                                                                                                                                                                                                                                                                                                                                                                                                                                                                                                                                                                                                                                                                                                                                                                                                                                                                                                                                                                                                               |
| <b>Financial Disclosure</b><br><br>Enter a financial disclosure statement that describes the sources of funding for the work included in this submission. Review the <a href="#">submission guidelines</a> for detailed requirements. View published research articles from <a href="#">PLOS ONE</a> for specific examples.<br><br>This statement is required for submission and <b>will appear in the published article</b> if the submission is accepted. Please make | This work was supported by grants from the National Key Research and Development Program of China (Grant No. 2018YFD0300300), and Science and Technology Innovation Talents Training Project of Liaoning Province (Grant No. XLYC1802044).                                                                                                                                                                                                                                                                                                                                                                                                                                                                                                                                                                                                                                                                                                                                                                                                                                    |

sure it is accurate.

#### Unfunded studies

Enter: *The author(s) received no specific funding for this work.*

#### Funded studies

Enter a statement with the following details:

- Initials of the authors who received each award
- Grant numbers awarded to each author
- The full name of each funder
- URL of each funder website
- Did the sponsors or funders play any role in the study design, data collection and analysis, decision to publish, or preparation of the manuscript?
- **NO** - Include this sentence at the end of your statement: *The funders had no role in study design, data collection and analysis, decision to publish, or preparation of the manuscript.*
- **YES** - Specify the role(s) played.

\* typeset

#### Competing Interests

Use the instructions below to enter a competing interest statement for this submission. On behalf of all authors, disclose any [competing interests](#) that could be perceived to bias this work—acknowledging all financial support and any other relevant financial or non-financial competing interests.

This statement is **required** for submission and **will appear in the published article** if the submission is accepted. Please make sure it is accurate and that any funding sources listed in your Funding Information later in the submission form are also declared in your Financial Disclosure statement.

View published research articles from [PLOS ONE](#) for specific examples.

The authors have declared that no competing interests exist.

**NO authors have competing interests**

Enter: *The authors have declared that no competing interests exist.*

**Authors with competing interests**

Enter competing interest details beginning with this statement:

*I have read the journal's policy and the authors of this manuscript have the following competing interests: [insert competing interests here]*

\* typeset

**Ethics Statement**

N/A

Enter an ethics statement for this submission. This statement is required if the study involved:

- Human participants
- Human specimens or tissue
- Vertebrate animals or cephalopods
- Vertebrate embryos or tissues
- Field research

Write "N/A" if the submission does not require an ethics statement.

General guidance is provided below. Consult the [submission guidelines](#) for detailed instructions. **Make sure that all information entered here is included in the Methods section of the manuscript.**

**Format for specific study types**

**Human Subject Research (involving human participants and/or tissue)**

- Give the name of the institutional review board or ethics committee that approved the study
- Include the approval number and/or a statement indicating approval of this research
- Indicate the form of consent obtained (written/oral) or the reason that consent was not obtained (e.g. the data were analyzed anonymously)

**Animal Research (involving vertebrate animals, embryos or tissues)**

- Provide the name of the Institutional Animal Care and Use Committee (IACUC) or other relevant ethics board that reviewed the study protocol, and indicate whether they approved this research or granted a formal waiver of ethical approval
- Include an approval number if one was obtained
- If the study involved *non-human primates*, add *additional details* about animal welfare and steps taken to ameliorate suffering
- If anesthesia, euthanasia, or any kind of animal sacrifice is part of the study, include briefly which substances and/or methods were applied

**Field Research**

Include the following details if this study involves the collection of plant, animal, or other materials from a natural setting:

- Field permit number
- Name of the institution or relevant body that granted permission

**Data Availability**

Authors are required to make all data underlying the findings described fully available, without restriction, and from the time of publication. PLOS allows rare exceptions to address legal and ethical concerns. See the [PLOS Data Policy](#) and [FAQ](#) for detailed information.

Yes - all data are fully available without restriction

A Data Availability Statement describing where the data can be found is required at submission. Your answers to this question constitute the Data Availability Statement and **will be published in the article**, if accepted.

**Important:** Stating 'data available on request from the author' is not sufficient. If your data are only available upon request, select 'No' for the first question and explain your exceptional situation in the text box.

Do the authors confirm that all data underlying the findings described in their manuscript are fully available without restriction?

**Describe where the data may be found in full sentences. If you are copying our sample text, replace any instances of XXX with the appropriate details.**

- If the data are **held or will be held in a public repository**, include URLs, accession numbers or DOIs. If this information will only be available after acceptance, indicate this by ticking the box below. For example: *All XXX files are available from the XXX database (accession number(s) XXX, XXX).*
- If the data are all contained **within the manuscript and/or Supporting Information files**, enter the following: *All relevant data are within the manuscript and its Supporting Information files.*
- If neither of these applies but you are able to provide **details of access elsewhere**, with or without limitations, please do so. For example:

*Data cannot be shared publicly because of [XXX]. Data are available from the XXX Institutional Data Access / Ethics Committee (contact via XXX) for researchers who meet the criteria for access to confidential data.*

*The data underlying the results presented in the study are available from (include the name of the third party*

All relevant data are within the manuscript and its Supporting Information files.

*and contact information or URL).*

- This text is appropriate if the data are owned by a third party and authors do not have permission to share the data.

\* typeset

Additional data availability information:

1 **Nitrogen fertilizer application rate impacts eating and**  
2 **cooking quality of rice after storage**

3

4 **Short title:** Effect of nitrogen fertilization rate on rice quality post-storage

5

6 Hanling Liang<sup>1</sup>, Dongbing Tao<sup>1</sup>, Qi Zhang<sup>1</sup>, Shuang Zhang<sup>1</sup>, Jiayi Wang<sup>2</sup>, Lifei Liu<sup>1</sup>,  
7 Zhaoxia Wu<sup>1\*</sup>, Wentao Sun<sup>3\*</sup>

8

9

10 <sup>1</sup> College of Food Science, Shenyang Agricultural University, Shenyang, 110866,

11 People's Republic of China

12 <sup>2</sup> College of Food and Chemical Engineering, Shaoyang University, Shaoyang, 422000,

13 People's Republic of China

14 <sup>3</sup> Institute of Plant Nutrition and Environmental Resources, Liaoning Academy of

15 Agricultural Sciences, Shenyang, 110161, People's Republic of China

16

17 \*Corresponding author

18 E-mail: [wuzxsau@163.com](mailto:wuzxsau@163.com) (ZW); [wentaosw@163.com](mailto:wentaosw@163.com) (WS)

19

20

21

22

## 23 Abstract

24 The effect of nitrogen fertilizer application on the quality of rice during storage is not well  
25 understood. The eating and cooking quality (ECQ) of rice treated with 0 (CK, control), 160  
26 (IN, insufficient nitrogen), 260 (AN, adequate nitrogen), and 420 (EN, excessive nitrogen)  
27 kg N/ha was analyzed over 12 months of storage. Results showed that the rate of nitrogen  
28 fertilizer application had no significant impact on the changes in taste value during storage.  
29 However, EN application significantly increased the hardness ( $p < 0.05$ ) and reduced the  
30 gumminess of rice ( $p < 0.05$ ), and delayed the decline in the viscosity of rice paste by two  
31 months after storage of one years. In conclusion, although EN application resulted in an  
32 inferior texture of rice, it delayed quality change by two months during storage. It was  
33 demonstrated that a rational nitrogen application rate (0–260 kg N/ha) for rice cultivation is  
34 particularly important to obtain high ECQ, but EN might be beneficial for the stability of the  
35 ECQ during storage.

36

37 **Keywords:** nitrogen; fertilizer; storage; rice; eating quality; cooking quality

38

## 39 Introduction

40 Rice, as a staple food, plays an important role in human diet, and is usually stored for  
41 long periods to meet the needs of people owing to its seasonal growth. However, many  
42 studies have reported that the storage process may result in the deterioration of the eating  
43 quality of rice, including increased hardness and reduced viscosity (Anonymous, 2016a).



44 Furthermore, the cooking and gelatinization characteristics may be changed, including  
45 increase in water absorption, volume expansion rate, cooking time, and setback, as well  
46 as a decrease in  viscosity, final viscosity, and breakdown (Keawpeng and  
47 Venkatachalam, 2015). This deterioration is mostly considered to be related to changes in  
48 the interactions between the proteins and starch within the rice grain (Chrastil, 1990; Guo  
49 *et al.*, 2015; Huang and Lai, 2014; Patindol *et al.*, 2005; Zhou *et al.*, 2003).

50 Numerous efforts have been made in recent years to reduce the deterioration of rice  
51 quality due to storage. Low temperature and humidity (Genkawa *et al.*, 2008; Park *et al.*,  
52 2012), as well as vacuum or nano packaging (Wang *et al.*, 2018) have proven to be  
53 beneficial in maintaining rice quality during storage. The methods have been applied in the  
54 storage of milled rice, which has a high commodity price, but not in rice paddy storage  
55 owing to the trade-off between the high cost of the storage method and the relatively low  
56 commodity value of rice paddy, which is also the reason why rice paddy is usually stored  
57 under natural conditions. To date, no feasible solution to the problem of quality loss during  
58 rice paddy storage is available. Except for storage conditions, the initial quality of rice is  
59 also a key factor for the end-use quality of rice after storage. Fertilization is important for  
60 the establishment of the initial quality of rice, especially the rate of nitrogen application rate.  
61 It is well-documented that nitrogen fertilizers have a prominent effect on the eating and  
62 cooking quality (ECQ) of rice (Kaur *et al.*, 2016), mainly owing to the increased protein  
63 content and decreased amylose content of rice (Cao *et al.*, 2017) resulting from nitrogen  
64 application, which causes an increase in the hardness of rice, decreasing its palatability

65 (Champagne *et al.*, 2009; Singh *et al.*, 2011; Zhu *et al.*, 2017b), and also alters the rice  
66 gelatinization characteristics and cooking quality.

67 The effect of nitrogen application rate on the initial quality of fresh rice is well known,  
68 but whether this effect persists during a period of storage is still unclear. Previous studies  
69 have indicated that fertilization has certain effects on the quality of tomato and potato  
70 during storage (Makani *et al.*, 2017; Unlu *et al.*, 2010). However, there are no reports  
71 addressing whether different nitrogen fertilization levels affect rice quality during storage.  
72 In this study, we explored the dynamic changes in the ECQ during storage of rice produced  
73 using different nitrogen application rates, and discussed the likely reasons behind the  
74 variations in ECQ after storage, with the objective of providing a theoretical basis for the  
75 production and quality-control of high-quality rice from the field to the table.

76

## 77 **Material and methods**

### 78 **Materials**

79 The experiment was conducted at Liaohe Delta, Panjin, China (122°14'17"N, 41°9'31"E).  
80 The physical and chemical properties of the 0–20 cm soil was as follows: pH 8.2, organic  
81 matter 22.57 g/kg, total nitrogen 1.42 g/kg, alkali nitrogen 105.24 mg/kg, available  
82 phosphorus 21.61 mg/kg, available potassium 164.22 mg/kg, and bulk density 1.39 g/cm<sup>3</sup>.  
83 The following treatment groups were set up for our studies: a control (CK) group without  
84 nitrogen treatment (0 kg N/ha), and three treatment groups with insufficient (IN; 160 kg  
85 N/ha), adequate (AN; 260 kg N/ha), and excessive (EN; 420 kg N/ha) nitrogen, based on

86 the typical nitrogen fertilization of 260 kg N/ha used by local farmers. Except for the  
87 nitrogen application rates, standard rice cultivation procedures were followed as done by  
88 the local farmers. The rice cultivar was Yanfeng 47, which is one of the main local varieties.  
89 The seedlings were transplanted on May 25, and harvested on October 8 in 2018.

## 90 **Sample preparation**

91 The grains were air-dried for a month to reduce moisture, and then stored under  
92 laboratory conditions for 12 months. The temperature and humidity conditions in the  
93 laboratory were recorded every three days, as shown in Fig 1. The paddy rice (500 g) was  
94 processed at an interval of two months in a ridge mill (FC2K, Yamamoto, Japan) and a  
95 milling machine (VP-32T, Yamamoto, Japan) to obtain brown and milled rice, respectively,  
96 for subsequent analyses.

97

98 **Fig 1. Record of temperature and relative humidity in the laboratory during the experimental**  
99 **period from November 2018 to November 2019.**

100

## 101 **Chemical component analysis**

102 The protein and amylose contents of brown rice were measured with a near-infrared  
103 grating nutrient analyzer (DA7200, Perten, Sweden). Fat content was determined with the  
104 Soxhlet extraction method described in GB 5009.6-2016 (Anonymous, 2016b). Rice  
105 moisture was determined using the method described in GB 5009.3-2016 (Anonymous,  
106 2016a).

107

## 108 **Eating quality analysis**

109 The taste value of the cooked rice was assessed according to Champagne et al.  
110 (Champagne *et al.*, 1996). Briefly, 30 g of milled rice was cooked according to GB/T 15682-  
111 2008 (Anonymous, 2008), and then 8 g of the cooked rice was pressed into rice cakes,  
112 and the taste value was measured with a rice taste analyzer (STA1B, Satake, Japan). The  
113 texture of the rice cakes (hardness, gumminess, and springiness, defined for instrumental  
114 texture analyses in the study by Champagne et al. (Champagne *et al.*, 1999)) was  
115 determined with the Texture Analyzer (Brookfield Engineering Laboratories, MA, US)  
116 according to Zhang et al. (Zhang *et al.*, 2019). The sample was compressed using a 35  
117 mm global probe attachment at a speed of 2 mm/second. The texture profile analysis  
118 settings were as follows: pre-test speed, 2.00 mm/s; post-test speed, 2.00 mm/s; time, 10  
119 s; trigger force, 0.05 N. The measurement was conducted in ten replicates.

120

## 121 **Cooking quality analysis**

122 The cooking quality was determined following the method of Gujral and Kumar  
123 (Gujral and Kumar, 2003), with minor modifications. Briefly, 2.5 grams of milled rice was  
124 boiled at 100 °C for 10 min in a beaker containing 50 mL distilled water. Then, three grains  
125 of rice were removed every minute, and pressed between two glass slides until the grains  
126 showed no chalky core; the total time was recorded as the cooking time and the  
127 measurement was done in three replicates. For volume expansion and water uptake, we  
128 measured the volume and weighed 2.5 g of milled rice before and after boiling, according  
129 to the aforementioned method for the cooking time. The pH of rice soup was determined

130 with a pH meter (PB-10, Sartorius, Germany). Volume expansion and water uptake were

131 calculated with the following formulae:

$$132 \quad \text{Volume expansion (\%)} = \frac{\text{Volume of cooked rice} - \text{Volume of uncooked rice}}{\text{Volume of uncooked rice}} \times 100$$

$$133 \quad \text{Water uptake (\%)} = \frac{\text{Weight of cooked rice} - \text{Weight of uncooked rice}}{\text{Weight of uncooked rice}} \times 100$$

134

## 135 **Pasting characteristic analysis**

136 The pasting parameters of milled rice flour, such as peak viscosity, trough viscosity,

137 breakdown, final viscosity, setback, peak time, and pasting temperature (Fig 2), were

138 determined with a rapid viscosity analyzer (RVA-4, Newport Scientific, Australia). Milled

139 rice flour (3.0 mg) was passed through a 100-mesh screen into a sample box containing

140 25 mL distilled water, and then analyzed with the rapid viscosity analyzer.

141

142 **Fig 2. Rapid viscosity analyzer profile of milled rice flour.**

143

## 144 **Statistical analysis**

145 All data were processed using Microsoft Excel 2019, and then analyzed for

146 significance using SPSS 22 software with the Duncan's test ( $p < 0.05$ ). All tables were

147 generated with Microsoft Word 2019. Graphs were plotted using Origin 8.5. Analysis of

148 variance and linear correlation analysis were conducted using SPSS 22, and linear

149 regression was used for Pearson correlation analysis between rice quality and chemical

150 components during storage.

151

## 152 **Results and discussion**

### 153 **ECQ and chemical composition of rice**

154       Among the ECQ indices evaluated, nitrogen application rates and storage time only  
155 showed significant interaction effects on gumminess, trough viscosity, and setback, ( $p <$   
156  $0.05$ ; data not shown), indicating that nitrogen application rate has a significant impact on  
157 the ECQ of rice during postharvest storage. Thus, controlling the nitrogen application rate  
158 in the fields is important for maintaining the ECQ of rice during storage.

159

### 160 **Content of chemical components**

161       Nitrogen application did not impact the change of protein, fat, and moisture contents  
162 in rice during storage (Fig 3). Amylose content in the CK and IN samples did not vary  
163 significantly during storage, but EN treatment significantly exacerbated the rate of amylose  
164 decline during the 4<sup>th</sup> to 10<sup>th</sup> months of storage, which demonstrated that nitrogen  
165 application in the field changed the starch metabolism of rice during storage.

166       During the storage period of 4–10 months, the amylose content decreased by 1% in  
167 the CK samples, and 4% with EN treatment. The decline in amylose content of rice during  
168 storage was also observed in the study by Gu *et al.*, and was attributed to endogenous  
169 degradation (Gu *et al.*, 2019).  $\alpha$ -Amylase is the main enzyme involved in starch hydrolysis.  
170 It has been reported that the activity of  $\alpha$ -amylase in rice is higher under higher nitrogen  
171 application rates (Zhu *et al.*, 2017a). Therefore, for our study, it is possible that nitrogen

172 application increased the activity of  $\alpha$ -amylase in rice, and accelerated the degradation of  
173 amylose during storage. However, this effect seems to be dependent on nitrogen  
174 application rate only in the case of EN, which is significant ( $p < 0.05$ ). Moreover, since  
175 amylose content is closely related to the ECQ of rice (Derycke *et al.*, 2005; Li *et al.*, 2016),  
176 the variations in amylose content between the different nitrogen application rates may have  
177 contributed to the differential changes in rice ECQ during storage.

178

179 **Fig 3. The changes in the content of chemical components in rice under storage, following**  
180 **the application of nitrogen at different rates.** CK, control group (0 kg N/ha); IN, insufficient  
181 nitrogen (160 kg N/ha); AN, adequate nitrogen (260 kg N/hm<sup>2</sup>); EN, excessive nitrogen  
182 (420 kg N/ha). Data (mean  $\pm$  standard deviation,  $n = 9$ ) with different letters are  
183 significantly different ( $p < 0.05$ ). For each parameter in the inset table, different lowercase  
184 letters in the same column differ significantly as a function of storage time as per Duncan's  
185 test ( $p < 0.05$ ). Different uppercase letters in the rows denote significant differences as a  
186 function of nitrogen application rates as per Duncan's test ( $p < 0.05$ ).

187

## 188 **Eating quality**

### 189 **Taste value**

190 As shown in Fig 4, rice exposed to different nitrogen application rates showed similar  
191 variations in taste value during storage. The taste value of rice was significantly reduced  
192 with a higher nitrogen application rate, and slightly decreased after storage, which is  
193 consistent with previous studies (Liu *et al.*, 2002; Zhu *et al.*, 2017b). Besides, without

194 storage, the taste value of rice under EN treatment decreased from 63 to 48 than CK group.  
195 For CK group, the taste value of rice stored for 12 months treatments decreased from 63  
196 to 60 than without storage (Fig 4). Notably, nitrogen application had a greater impact on  
197 the taste value of rice than storage under the conditions of this study. Accordingly,  
198 controlling the rate of nitrogen application for cultivating rice is particularly important for  
199 maintaining the high eating quality of rice during storage.

200

## 201 **Textural characteristics**

202 Hardness, gumminess, and springiness are important parameters for the textural  
203 evaluation of cooked rice (Zhou *et al.*, 2007). In this study, nitrogen application increased  
204 the hardness, and reduced the gumminess, but had little impact on the springiness of  
205 cooked rice, as compared before and after storage (Fig 4), which means that nitrogen  
206 application accelerated the degree of deterioration of textural characteristics of rice during  
207 storage.

208 As shown in Fig 4, the change in hardness of rice after storage for 12 months for the  
209 CK, IN, AN, and EN groups was -11%, +16%, +11%, and +14%, respectively, compared  
210 to rice without storage. Further, change in gumminess of rice from the CK, IN, AN, and EN  
211 groups was -40%, +16%, -47%, and -48%, respectively.

212 Hardness is positively related to the amylose content (Li *et al.*, 2016), and gumminess  
213 is closely related to the amylopectin content in the leachate produced by cooking the rice  
214 (Li *et al.*, 2019), especially the high proportion of short chain amylopectin (Li *et al.*, 2016).  
215 However, in our study, the more profound increase in hardness and decline in gumminess



216 for 0–12 months of storage under EN treatments seemed to be somewhat linked to the  
217 changes in the chemical components alone (protein, amylose, fat, and moisture contents),  
218 as shown in Fig 3. Moreover, the increase in hardness and decline in gumminess during  
219 storage is mainly due to the formation of amylose–lipid complexes (Sodhi *et al.*, 2007) and  
220 the increase in the content of high molecular weight proteins caused by protein aggregation  
221 (Tulyathan and Leeharatanaluk, 2007). Further, the solubility of protein and amylose is  
222 reduced owing to changes in their interactions in rice, and results in reduced gumminess  
223 (Zhou *et al.*, 2002). However, the decreased amylose content observed in our study may  
224 not be conducive to the formation of amylose–lipid complexes. It has been proven that  
225 nitrogen application increases the high molecular weight subunits in protein fractions (Kaur  
226 *et al.*, 2016). Thus, in this experiment, it is possible that the nitrogen application had a  
227 greater effect on the increase in the content of high molecular weight proteins during  
228 storage (especially for late-storage), which caused marked reduction in the solubility of rice  
229 components, and resulted in increased hardness and reduced gumminess after storage.  
230 However, further investigations are needed to verify this observation.

231

232 **Fig 4. The changes in the eating quality of rice during storage, following the application of**  
233 **nitrogen at different rates.** CK, control group (0 kg N/ha); IN, insufficient nitrogen (160  
234 kg N/ha); AN, adequate nitrogen (260 kg N/ha); EN, excessive nitrogen (420 kg N/ha).  
235 For each parameter, the mean  $\pm$  standard deviation (n = 3) followed by different  
236 lowercase letters in the same column differ significantly as per Duncan's test (p < 0.05)  
237 as a function of storage time. Different uppercase letters in the rows denote significant

238 differences as per Duncan's test ( $p < 0.05$ ) as a function of different nitrogen  
239 application rates.

240

## 241 **Cooking quality**

242 Except for the pH of the rice soup, there were no significant differences in the changes  
243 in cooking quality index during storage between different nitrogen application rates (Fig 5),  
244 which means that nitrogen fertilizer application during cultivation had little impact on the  
245 change in cooking quality of rice during storage.

246 Compared with other treatments, EN treatment exacerbated the reduction in the pH  
247 of rice soup during storage for 4–6 months. The changes in the pH of rice soup for CK, IN,  
248 AN, and EN groups were -0.7%, +0.7%, -0.3%, and -3%, respectively. Further, the EN  
249 treatment maintained a low pH of rice soup even after storage of rice for 6 months.

250 The principal sources of acidic substances in rice during storage are the free fatty  
251 acids produced during fat oxidation (Zhou *et al.*, 2002). EN may have increased the activity  
252 of enzymes related to lipid oxidation, such as lipoxygenase, and increased lipid oxidation  
253 to produce more fatty acids, resulting in a greater reduction in the pH of rice soup than the  
254 CK group. Our results confirmed that the fatty acid concentration of rice for the EN  
255 treatment was higher than that of the other treatments at late storage (data not shown).  
256 Although the change in pH of the rice soup was not enough to cause sensory differences,  
257 it may be possible that the changes in fatty acids, flavor substances, and other metabolites  
258 might be due to the change in pH, and deserves further investigation.

259

260 **Fig 5. Changes in the cooking quality of rice during storage, following the application of**  
261 **nitrogen at different rates.** CK, control group (0 kg N/ha); IN, insufficient nitrogen (160  
262 kg N/ha); AN, adequate nitrogen (260 kg N/ha); EN, excessive nitrogen (420 kg N/ha).  
263 For each parameter, the mean  $\pm$  standard deviation (n = 3) followed by different  
264 lowercase letters in the same column differ significantly as per Duncan's test ( $p < 0.05$ )  
265 as a function of storage time. Different uppercase letters in the rows denote significant  
266 differences as per Duncan's test ( $p < 0.05$ ) as a function of different nitrogen  
267 application rates.

268

## 269 **Pasting characteristics of rice flour**

270 Pasting characteristics of rice flour are considered to be closely related to the ECQ of  
271 rice (Fitzgerald *et al.*, 2003), and are also one of the sensitive indicators that reflect rice  
272 aging during storage (Keawpeng and Venkatachalam, 2015). The rate of decline in  
273 viscosity index usually represents the aging of rice.

274 As shown in Fig 6, small differences were observed between the four nitrogen  
275 application rates in terms of the changes in setback, breakdown, peak time, and pasting  
276 temperature during storage. Further, the viscosity indices (peak viscosity, final viscosity,  
277 and trough viscosity) of rice in the AN and EN treatments were lower than that in CK during  
278 the one-year storage period, which indicated that AN and EN application were not  
279 conducive to maintaining good viscosity of rice, which is consistent with a previous study  
280 (Yang *et al.*, 2016). Nevertheless, the decline of trough viscosity started in rice after four  
281 months of storage for the CK and IN groups, and after six months for the AN and EN

282 treatments. For final viscosity, the trend was similar to that of the trough viscosity. It implies  
283 that AN and EN application delayed the aging of rice during storage to some extent.

284 Although this paper only discusses the change in pasting characteristics over one  
285 year, considering that the storage time of rice in actual production may be far more than  
286 one year, it can be imagined that if the storage is prolonged, this effect due to the delay  
287 may be more obvious. Therefore, this observation may be of great significance in delaying  
288 the change of pasting characteristics during rice aging in the future, and the underlying  
289 mechanisms are worth further study.

290

291 **Fig 6. The changes in pasting characteristics of rice during storage, following nitrogen**  
292 **application at different rates.** CK, control group (0 kg N/ha); IN, insufficient nitrogen (160  
293 kg N/ha); AN, adequate nitrogen (260 kg N/ha); EN, excessive nitrogen (420 kg N/ha).  
294 Data (mean  $\pm$  standard deviation, n = 9) with different letters are significantly different ( $p <$   
295 0.05). For each parameter, different lowercase letters in the same column differ  
296 significantly as a function of storage time. Different uppercase letters in the rows denote  
297 significant differences as a function of different nitrogen application rates.

## 298 **Correlation between rice quality index and changes in** 299 **chemical composition**

300 In all the experimental groups, the effect of protein/amylose ratio on the ECQ of rice was  
301 greater than that of the amylose and protein contents alone (Table 1), which was a  
302 complement to what is usually observed upon analyzing amylose and protein contents and  
303 their correlation with ECQ of rice (Kim *et al.*, 2010; Ramesh *et al.*, 2000). We observed that

304 the protein/amylose ratio had a greater impact on the eating quality of rice during storage,  
305 implying that greater emphasis must be placed on this index when considering the changes  
306 in rice quality during future storage operations. Besides, the protein/amylose ratio had a  
307 significantly ( $p < 0.05$ ) negative correlation with breakdown, and the peak and trough  
308 viscosity (Table 1). Apparently, the change in peak and trough viscosity of rice, delayed by  
309 excessive nitrogen application (Fig 4), may be related to the change in protein/amylose  
310 ratio. In this study, this ratio was at a high level in the EN treatment (data not shown), which  
311 means that high protein/amylose ratio may be beneficial in the stability of rice.  
312 Nonetheless, the observation is worth further investigation and validation in other rice  
313 varieties.

314 Table 1. Correlation analysis between taste quality indices and chemical composition changes of rice during storage, following nitrogen application at  
 315 different rates.

|                  | Protein content |        |        |         | Amylose content |         |        |      | Protein content/amylose content |         |         |         |
|------------------|-----------------|--------|--------|---------|-----------------|---------|--------|------|---------------------------------|---------|---------|---------|
|                  | N0              | N160   | N260   | N420    | N0              | N160    | N260   | N420 | N0                              | N160    | N260    | N420    |
| Taste value      | -.893**         |        |        |         |                 |         |        |      | -.848*                          | -.848*  | -.848*  | -.848*  |
| Hardness         |                 |        |        |         |                 | -.893** |        |      |                                 |         |         |         |
| Gumminess        |                 | -.786* |        |         |                 |         | .786*  |      |                                 |         |         |         |
| Springiness      |                 |        |        | -.775*  |                 |         | .964** |      | -.818*                          | -.818*  | -.818*  | -.818*  |
| Cooking time     |                 |        |        | -.757*  | .811*           |         |        |      | -.798*                          | -.798*  | -.798*  | -.798*  |
| Water uptake     |                 |        |        | -.883** | .893**          |         |        |      | -.815*                          | -.815*  | -.815*  | -.815*  |
| Volume expansion |                 | -.821* |        | -.955** |                 |         |        |      |                                 |         |         |         |
| Rice soup pH     |                 | .786*  |        | .883**  |                 |         |        |      |                                 |         |         |         |
| Peak viscosity   |                 |        |        |         |                 |         |        |      |                                 | -.891** | -.820*  | -.805*  |
| Trough viscosity |                 |        |        |         |                 |         |        |      |                                 | -.855*  | -.904** | -.886** |
| Breakdown        |                 |        |        |         |                 |         |        |      |                                 | -.855*  | -.907** | -.888** |
| Setback          |                 |        |        |         |                 |         |        |      |                                 | -.777*  |         |         |
| Peak time        |                 |        | -.821* | -.818*  |                 |         |        |      |                                 | -.794*  |         | -.776*  |

316 \*p < 0.05, \*\*p < 0.01.



## 318 **Conclusions**

319 To our knowledge, this is the first report on the effect of nitrogen fertilizer levels on rice  
320 quality during storage. Results showed that excessive nitrogen application significantly  
321 increased the hardness and reduced the gumminess during late storage. AN and EN  
322 applications delayed the change in the viscosity of rice paste. In addition, during storage,  
323 the protein/amylose ratio showed a better correlation to the ECQ of rice than the protein or  
324 amylose contents alone. The results demonstrated that fertilizer application rate affected  
325 the quality of the agricultural product during storage by influencing the initial quality of the  
326 raw material. Hence, more attention should be paid to the effects of pre-harvest field  
327 fertilization on the quality changes of agricultural products during storage, so as to better  
328 ensure the high-quality of agricultural products from the field to the plate.

329

## 330 **Acknowledgements**

331 Hanling Liang contributed to the conception and data analyses of the study and wrote the  
332 manuscript. Zhaoxia Wu and Wentao Sun supervised the entire project and contributed  
333 significantly to manuscript preparation. Dongbing Tao, Qi Zhang, Shuang Zhang, Jiayi  
334 Wang, and Lifei Liu determined the postharvest quality of rice. All authors read and  
335 approved the final manuscript.

336 The authors appreciate the contributions of Tian Zhang, Chen Yang, Yubo Liu, Wanning  
337 Zhao, Yu Fu, Tianyu Wang, Liyan Rong, and Baiyu Gu in the experiments.

338



## 339 Funding

340 This work was supported by grants from the National Key Research and Development  
341 Program of China (Grant No. 2018YFD0300300), and Science and Technology Innovation  
342 Talents Training Project of Liaoning Province (Grant No. XLYC1802044).

343

344

## 345 REFERENCES

- 346 Anonymous, 2008. Grain and oil inspection, Sensory evaluation method for cooking  
347 quality of rice and rice. General Administration of Quality Supervision  
348 Inspection and Quarantine of China.
- 349 Anonymous, 2016a. National food safety standards, Determination of moisture in  
350 food. National Health and Family Planning Commission of China.
- 351 Anonymous, 2016b. National food safety standards, Determination of fat in food.  
352 State Food and drug administration of China.
- 353 Cao, X.M., Sun, H.Y., Wang, C.G., Ren, X.J., Liu, H.F. and Zhang, Z.J., 2017. Effects  
354 of late-stage nitrogen fertilizer application on the starch structure and cooking  
355 quality of rice. *Journal of the Science of Food and Agriculture* 98: 2332-2340.  
356 10.1002/jsfa.8723
- 357 Champagne, E.T., Bett-Garber, K.L., Thomson, J.L. and Fitzgerald, M.A., 2009.  
358 Unraveling the impact of nitrogen nutrition on cooked rice flavor and texture.  
359 *Cereal Chemistry* 86: 274-280. 10.1094/CCHEM-86-3-0274
- 360 Champagne, E.T., Bett, K.L., Vinyard, B.T., McClung, A.M., Barton, F.E.,  
361 Moldenhauer, K., Linscombe, S. and McKenzie, K., 1999. Correlation  
362 between cooked rice texture and rapid visco analyser measurements. *Cereal*  
363 *Chemistry* 76: 764-771.
- 364 Champagne, E.T., Richard, O.A., Bett, K., Grimm, C., Vinyard, B., Webb, B.,  
365 McClung, A., Barton, F., Lyon, B. and Moldenhauer, K., 1996. Quality  
366 evaluation of US medium-grain rice using a Japanese taste analyzer. *Cereal*  
367 *Chemistry* 73: 290-294.

- 368 Chrastil, J., 1990. Protein-starch interactions in rice grains. Influence of storage on  
369 oryzenin and starch. *Journal of Agricultural and Food Chemistry* 38: 1804-  
370 1809.
- 371 Derycke, V., Veraverbeke, W.S., Vandeputte, G.E., Man, W.D., Hosney, R.C. and  
372 Delcour, J.A., 2005. Impact of Proteins on Pasting and Cooking Properties of  
373 Nonparboiled and Parboiled Rice. *Cereal Chemistry* 82: 468-474.
- 374 Fitzgerald, M.A., Martin, M., Ward, R.M., Park, W.D. and Shead, H.J., 2003.  
375 Viscosity of rice flour: a rheological and biological study. *Journal of*  
376 *Agricultural and Food Chemistry* 51: 2295-2299. 10.1021/jf020574i
- 377 Genkawa, T., Uchino, T., Inoue, A., Tanaka, F. and Hamanaka, D., 2008. Development  
378 of a low-moisture-content storage system for brown rice: Storability at  
379 decreased moisture contents. *Biosystems Engineering* 99: 515-522.
- 380 Gu, F., Gong, B., Gilbert, R.G., Yu, W., Li, E. and Li, C., 2019. Relations between  
381 changes in starch molecular fine structure and in thermal properties during rice  
382 grain storage. *Food Chemistry* 295: 484-492.
- 383 Gujral, H.S. and Kumar, V., 2003. Effect of accelerated aging on the physicochemical  
384 and textural properties of brown and milled rice. *Journal of Food Engineering*  
385 59: 117-121.
- 386 Guo, Y.B., Cai, W.R., Tu, K., Wang, S.M. and Zhu, X.L., 2015. Key Proteins Causing  
387 Changes in Pasting Properties of Rice During Aging. *Cereal Chemistry* 92:  
388 384-388. 10.1094/cchem-05-14-0104-r
- 389 Huang, Y.-C. and Lai, H.-M., 2014. Characteristics of the starch fine structure and  
390 pasting properties of waxy rice during storage. *Food Chemistry* 152: 432-439.  
391 10.1016/j.foodchem.2013.11.144
- 392 Kaur, A., Ghumman, A., Singh, N., Kaur, S., Viridi, A.S., Riar, G.S. and Mahajan, G.,  
393 2016. Effect of different doses of nitrogen on protein profiling, pasting and  
394 quality attributes of rice from different cultivars. *J Food Sci Technol* 53: 2452-  
395 2462. 10.1007/s13197-016-2230-z
- 396 Keawpeng, I. and Venkatachalam, K., 2015. Effect of aging on changes in rice  
397 physical qualities. *International Food Research Journal* 22: 2180-2187.
- 398 Kim, Y.J., Choi, S.H., Han, Y.J., Jang, I.C., Song, J.T., Bhoo, S.H. and Seo, H.S.,  
399 2010. Rice Protein Disulfide Isomerase (OsPDI) and Rice Chaperone Binding  
400 Protein (OsBiP) Levels Are Not Directly Correlated with the Eating Quality of  
401 Rice. *Journal of the Korean Society for Applied Biological Chemistry* 53: 508-  
402 511. 10.3839/jksabc.2010.077
- 403 Li, H.Y., Lei, N.Y., Yan, S., Gao, M.Y., Yang, J.Y., Wang, J. and Sun, B.G., 2019.  
404 Molecular causes for the effect of cooking methods on rice stickiness: A  
405 mechanism explanation from the view of starch leaching. *International Journal*

- 406 of Biological Macromolecules 128: 49-53. 10.1016/j.ijbiomac.2019.01.113
- 407 Li, H.Y., Prakash, S., Nicholson, T.M., Fitzgerald, M.A. and Gilbert, R.G., 2016. The  
408 importance of amylose and amylopectin fine structure for textural properties  
409 of cooked rice grains. Food Chemistry 196: 702-711.  
410 10.1016/j.foodchem.2015.09.112
- 411 Liu, H.J., Watanabe, K., Tojo, S., Sugiyama, T. and Makino, E., 2002. A study on the  
412 effect of storage conditions upon rice quality (Part 1) Change in quality of  
413 milled rice during storage. Journal of the Japanese Society of Agricultural  
414 Machinery.
- 415 Makani, M.N., Sargent, S.A., Zotarelli, L., Huber, D.J. and Sims, C.A., 2017. Harvest  
416 Interval Has Greater Effect on Periderm Maturity and Storage Quality of  
417 Early-maturing, Tablestock Potato than Nitrogen Rate. HortScience: a  
418 publication of the American Society for Horticultural Science 52: 1390-1395.
- 419 Park, C.E., Kim, Y.S., Park, K.J. and Kim, B.K., 2012. Changes in physicochemical  
420 characteristics of rice during storage at different temperatures. Journal of  
421 Stored Products Research 48: 25-29.
- 422 Patindol, J., Wang, Y.J. and Jane, J.I., 2005. Structure-functionality changes in starch  
423 following rough rice storage. Starch-Stärke 57: 197-207.
- 424 Ramesh, M., Bhattacharya, K.R. and Mitchell, J.R., 2000. Developments in  
425 understanding the basis of cooked-rice texture. Critical Reviews in Food  
426 Science and Nutrition 40: 449-460. 10.1080/10408690091189220
- 427 Singh, N., Pal, N., Mahajan, G., Singh, S. and Shevkani, K., 2011. Rice grain and  
428 starch properties: Effects of nitrogen fertilizer application. Carbohydrate  
429 Polymers 86: 219-225. 10.1016/j.carbpol.2011.04.039
- 430 Sodhi, N.S., Singh, N., Arora, M. and Singh, J., 2007. Changes in physico-chemical,  
431 thermal, cooking and textural properties of rice during aging. Journal of Food  
432 Processing & Preservation 27: 387-400.
- 433 Tulyathan, V. and Leecharatanaluk, B., 2007. Changes in quality of rice (*oryza sativa*  
434 l.) cv. Khao dawk mali 105 during storage. Journal of Food Biochemistry 31:  
435 415-425.
- 436 Unlu, H., Unlu, H.O., Karakurt, Y. and Padem, H., 2010. Organic and conventional  
437 production systems, microbial fertilization and plant activators affect tomato  
438 quality during storage. African Journal of Biotechnology 9: 7909-7914.
- 439 Wang, F., Hu, Q., Mariga, A.M., Cao, C. and Yang, W., 2018. Effect of nano  
440 packaging on preservation quality of Nanjing 9108 rice variety at high  
441 temperature and humidity. Food Chemistry 239: 23-31.  
442 10.1016/j.foodchem.2017.06.082

- 443 Yang, X., Bi, J., Gilbert, R.G., Li, G., Liu, Z., Wang, S. and Ding, Y., 2016.  
444 Amylopectin chain length distribution in grains of japonica rice as affected by  
445 nitrogen fertilizer and genotype. *Journal of Cereal Science* 71: 230-238.  
446 10.1016/j.jcs.2016.09.003
- 447 Zhang, N., Wen, Y.Y., Yan, S., Mao, H.J., Lei, N.Y., Li, H.Y., Wang, J., Chen, H.T. and  
448 Sun, B.G., 2019. The increased stickiness of non-glutinous rice by alkali  
449 soaking and its molecular causes. *International Journal of Biological*  
450 *Macromolecules* 135: 394-399. 10.1016/j.ijbiomac.2019.05.184
- 451 Zhou, Z., Robards, K., Helliwell, S. and Blanchard, C., 2002. Ageing of Stored Rice:  
452 Changes in Chemical and Physical Attributes. *Journal of Cereal Science* 35:  
453 65-78.
- 454 Zhou, Z., Robards, K., Helliwell, S. and Blanchard, C., 2003. Effect of rice storage on  
455 pasting properties of rice flour. *Food Research International* 36: 625-634.
- 456 Zhou, Z., Robards, K., Helliwell, S. and Blanchard, C., 2007. Effect of storage  
457 temperature on cooking behaviour of rice. *Food Chemistry* 105: 491-497.
- 458 Zhu, D.W., Zhang, H.C., Guo, B.W., Xu, K., Dai, Q.G., Wei, C.X., Zhou, G.S. and  
459 Huo, Z.Y., 2017a. Effects of nitrogen level on structure and physicochemical  
460 properties of rice starch. *Food Hydrocolloids* 63: 525-532.  
461 10.1016/j.foodhyd.2016.09.042
- 462 Zhu, D.W., Zhang, H.C., Guo, B.W., Xu, K., Dai, Q.G., Wei, H.Y., Gao, H., Hu, Y.J.,  
463 Cui, P.Y. and Huo, Z.Y., 2017b. Effects of nitrogen level on yield and quality  
464 of japonica soft super rice. *Journal of Integrative Agriculture* 16: 1018-1027.  
465 10.1016/s2095-3119(16)61577-0

466

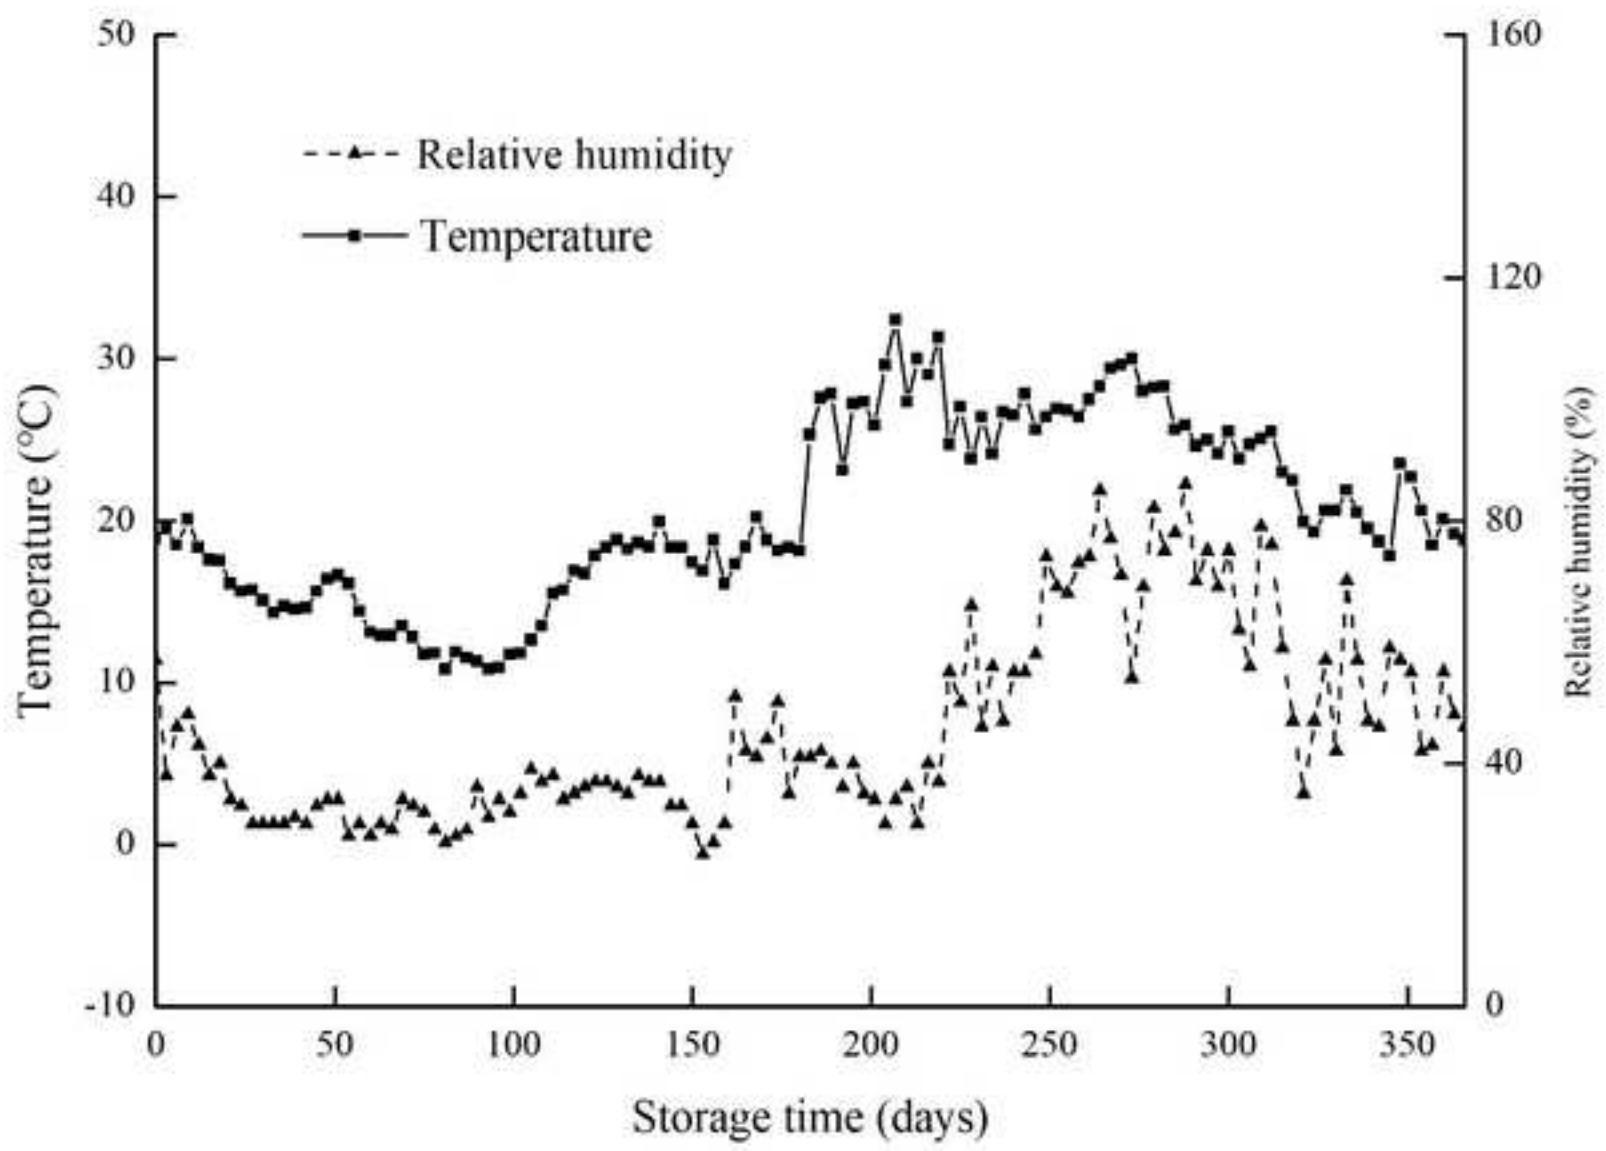

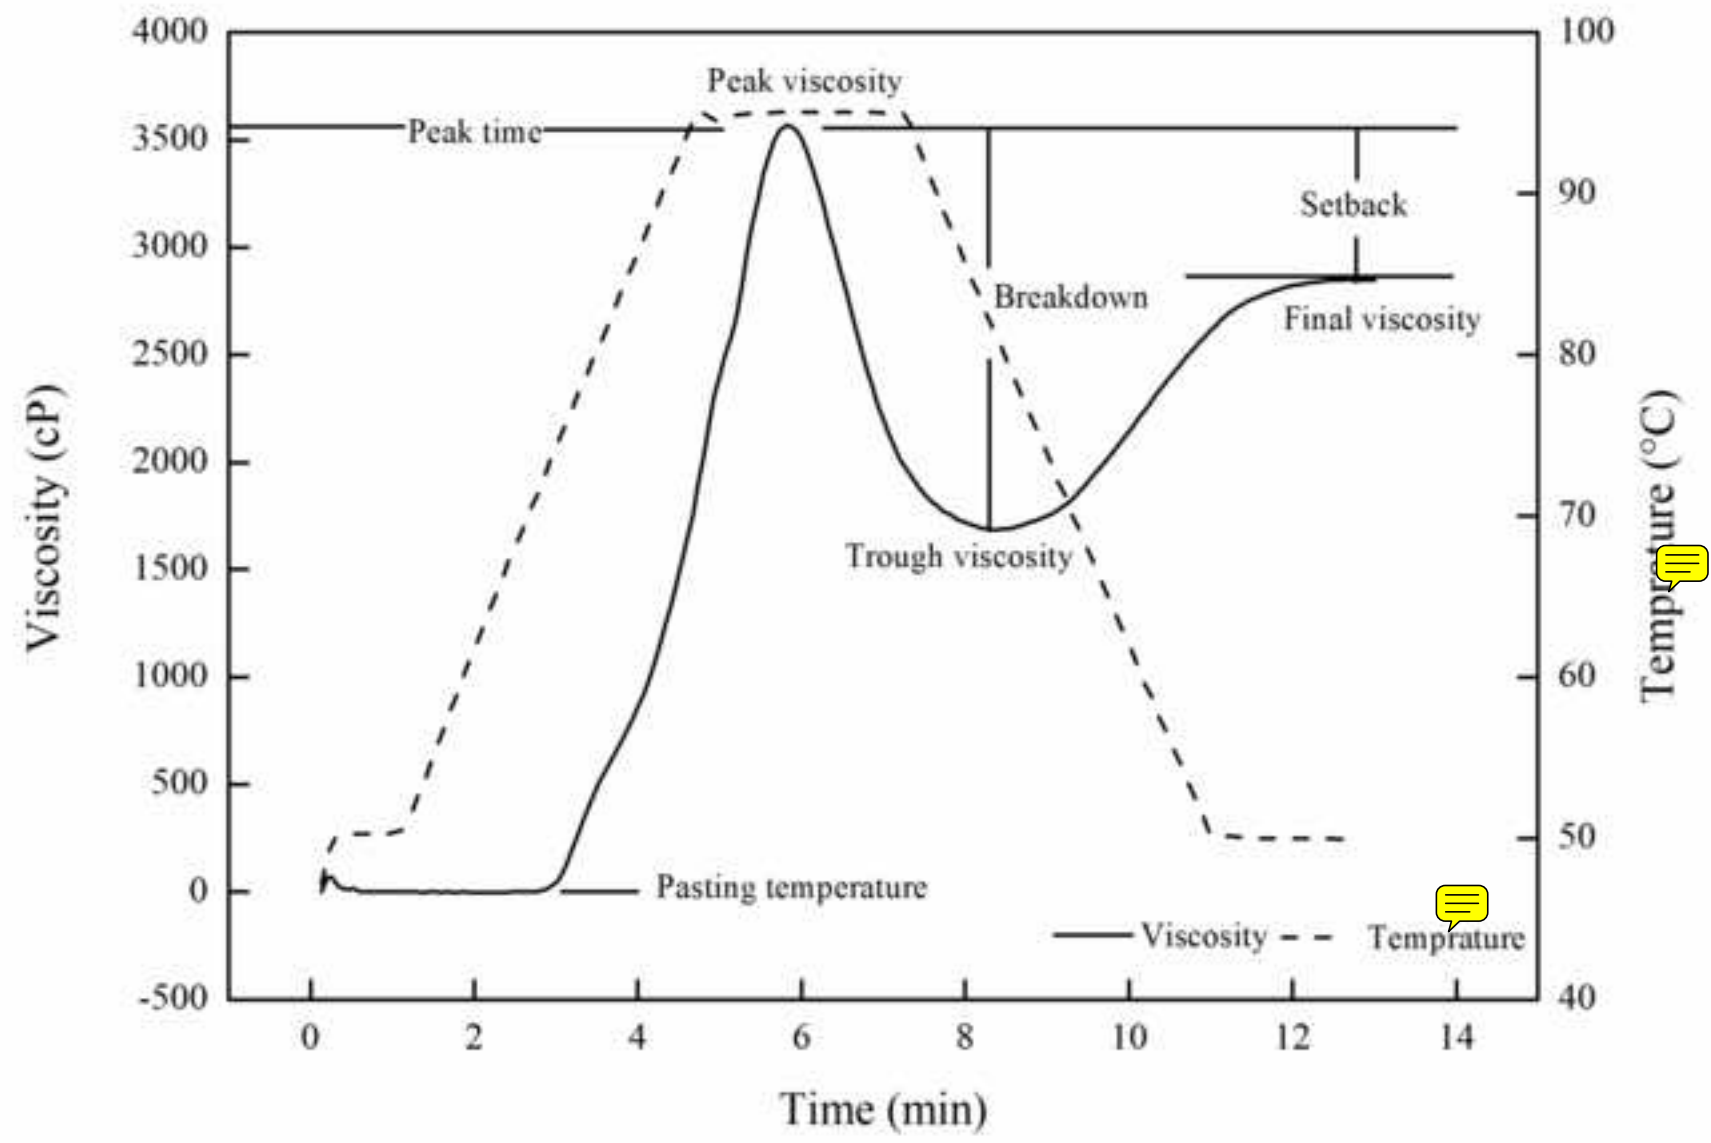

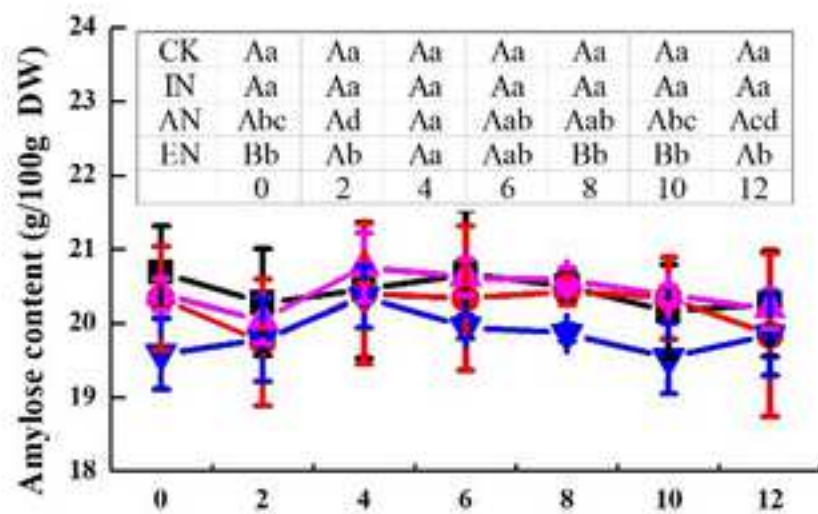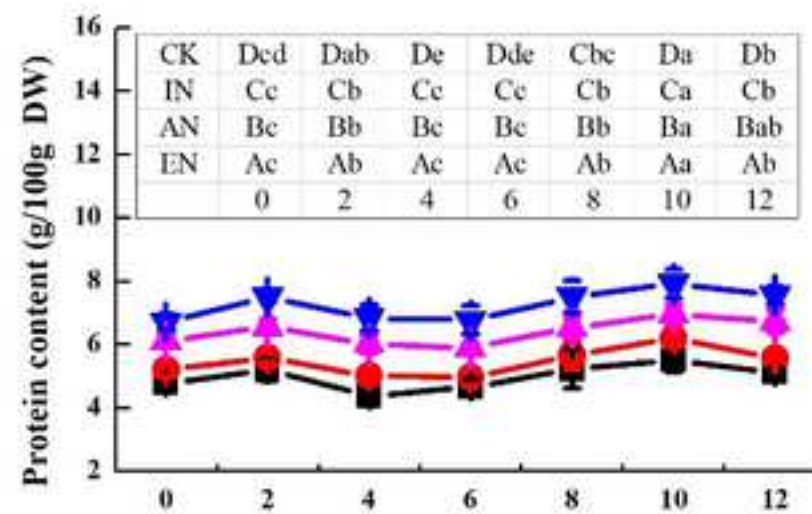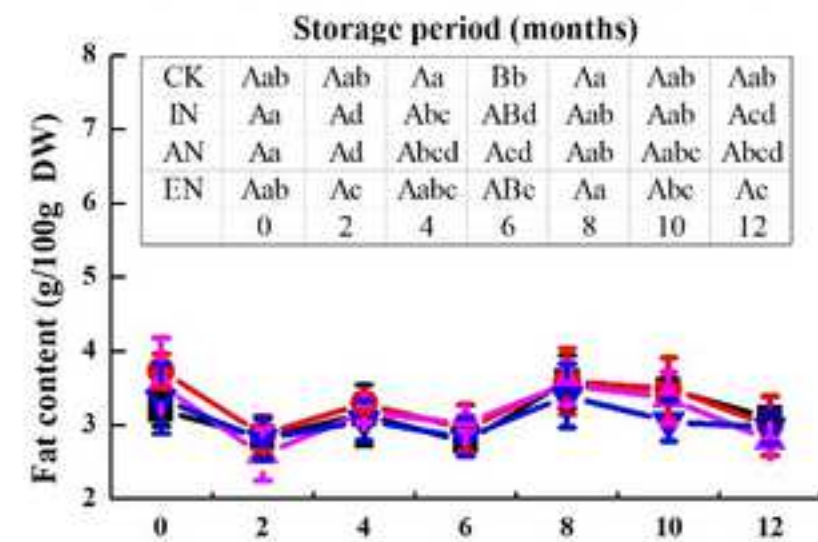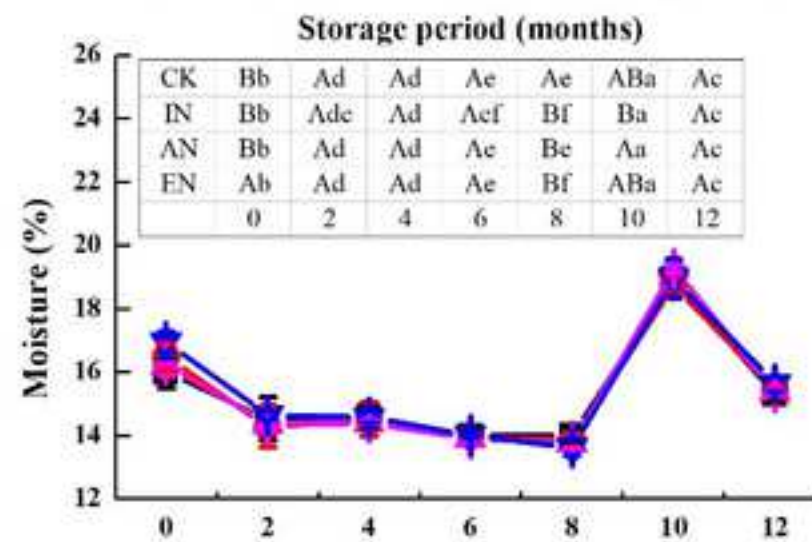

■ CK

● IN

▲ AN

▼ EN

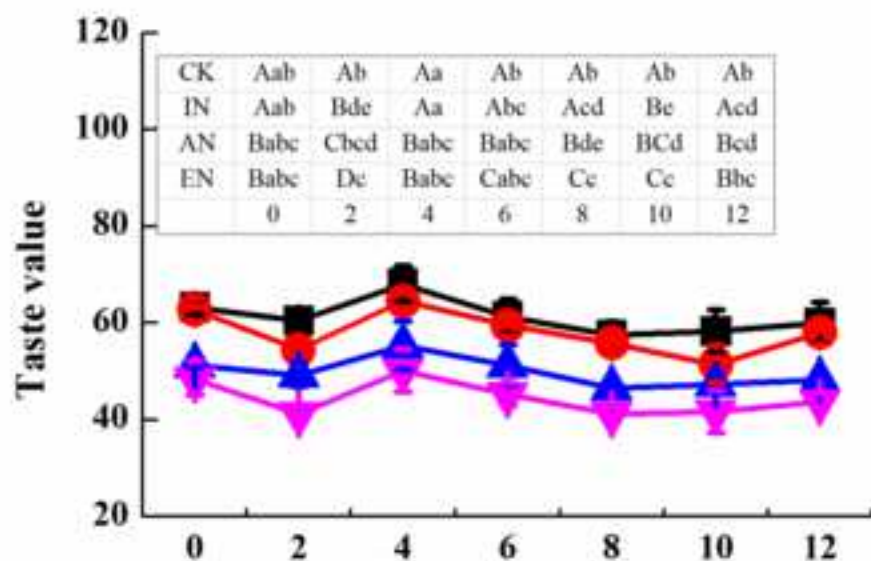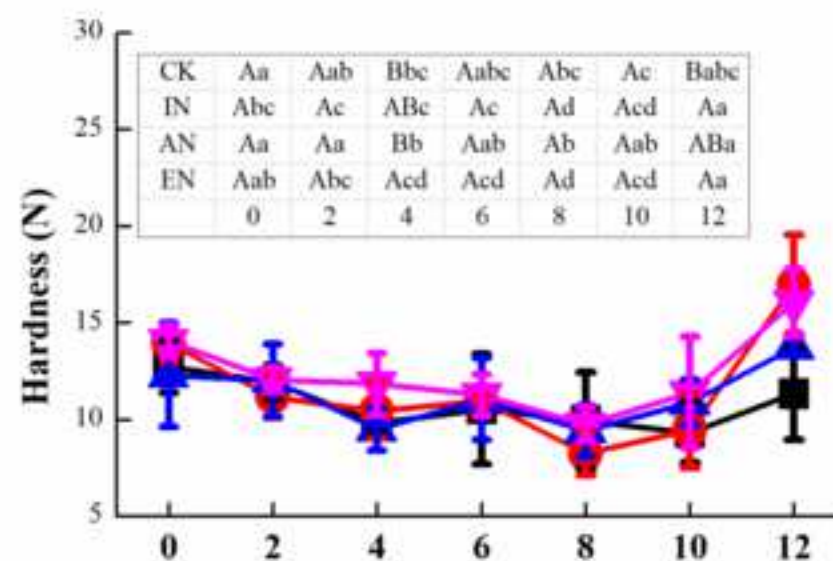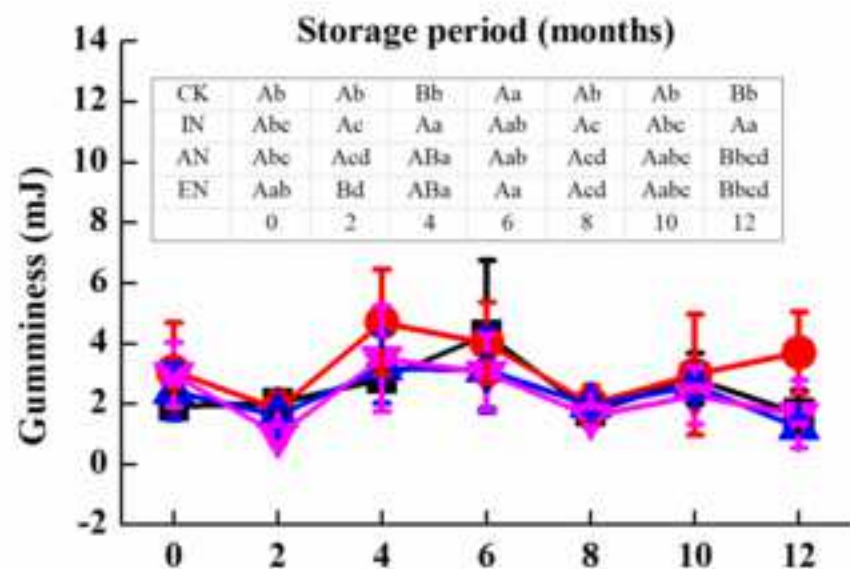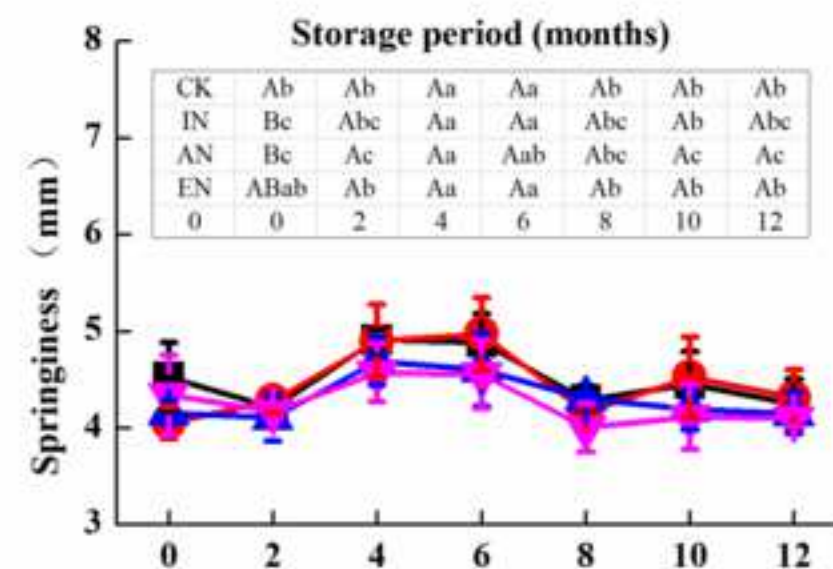

Storage time (months)

Storage period (months)

■ CK

● IN

▲ AN

▼ EN



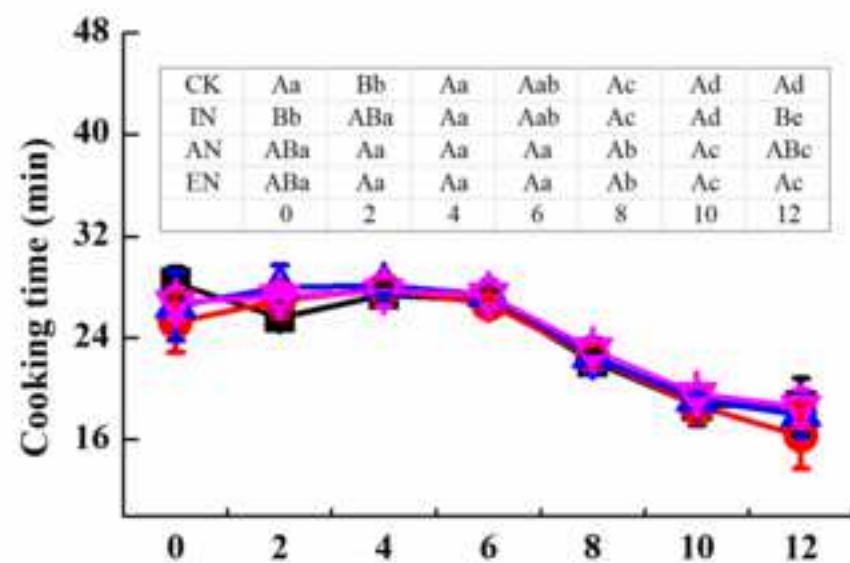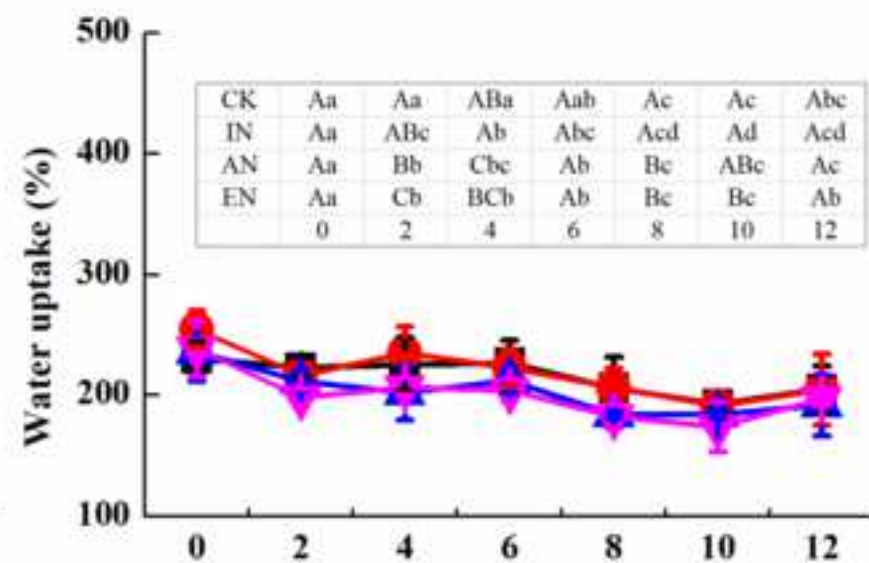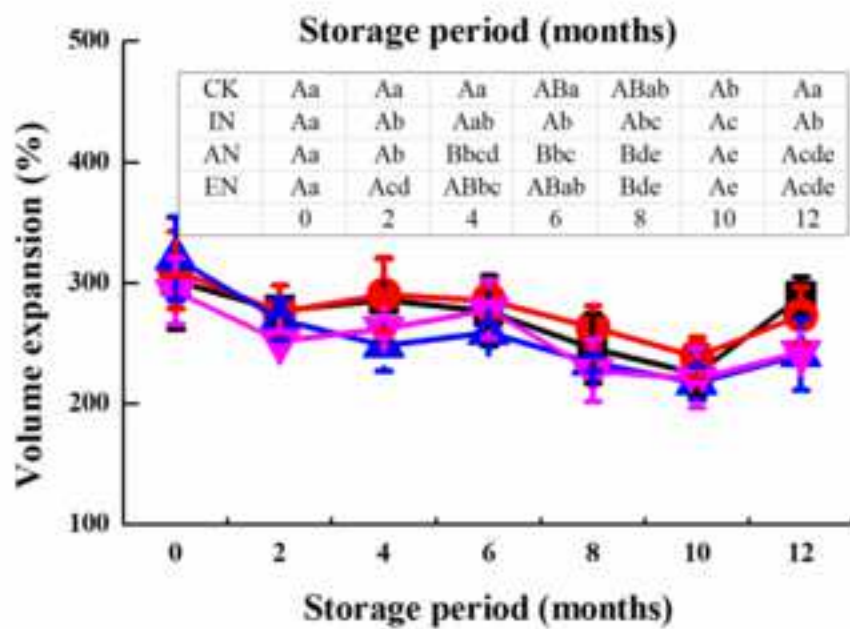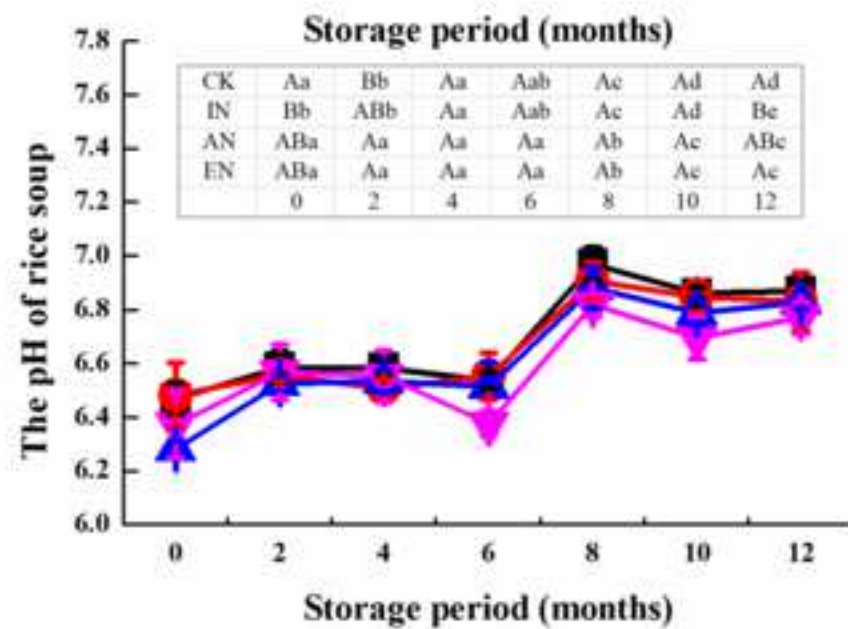

■ CK    ● IN    ▲ AN    ▼ EN

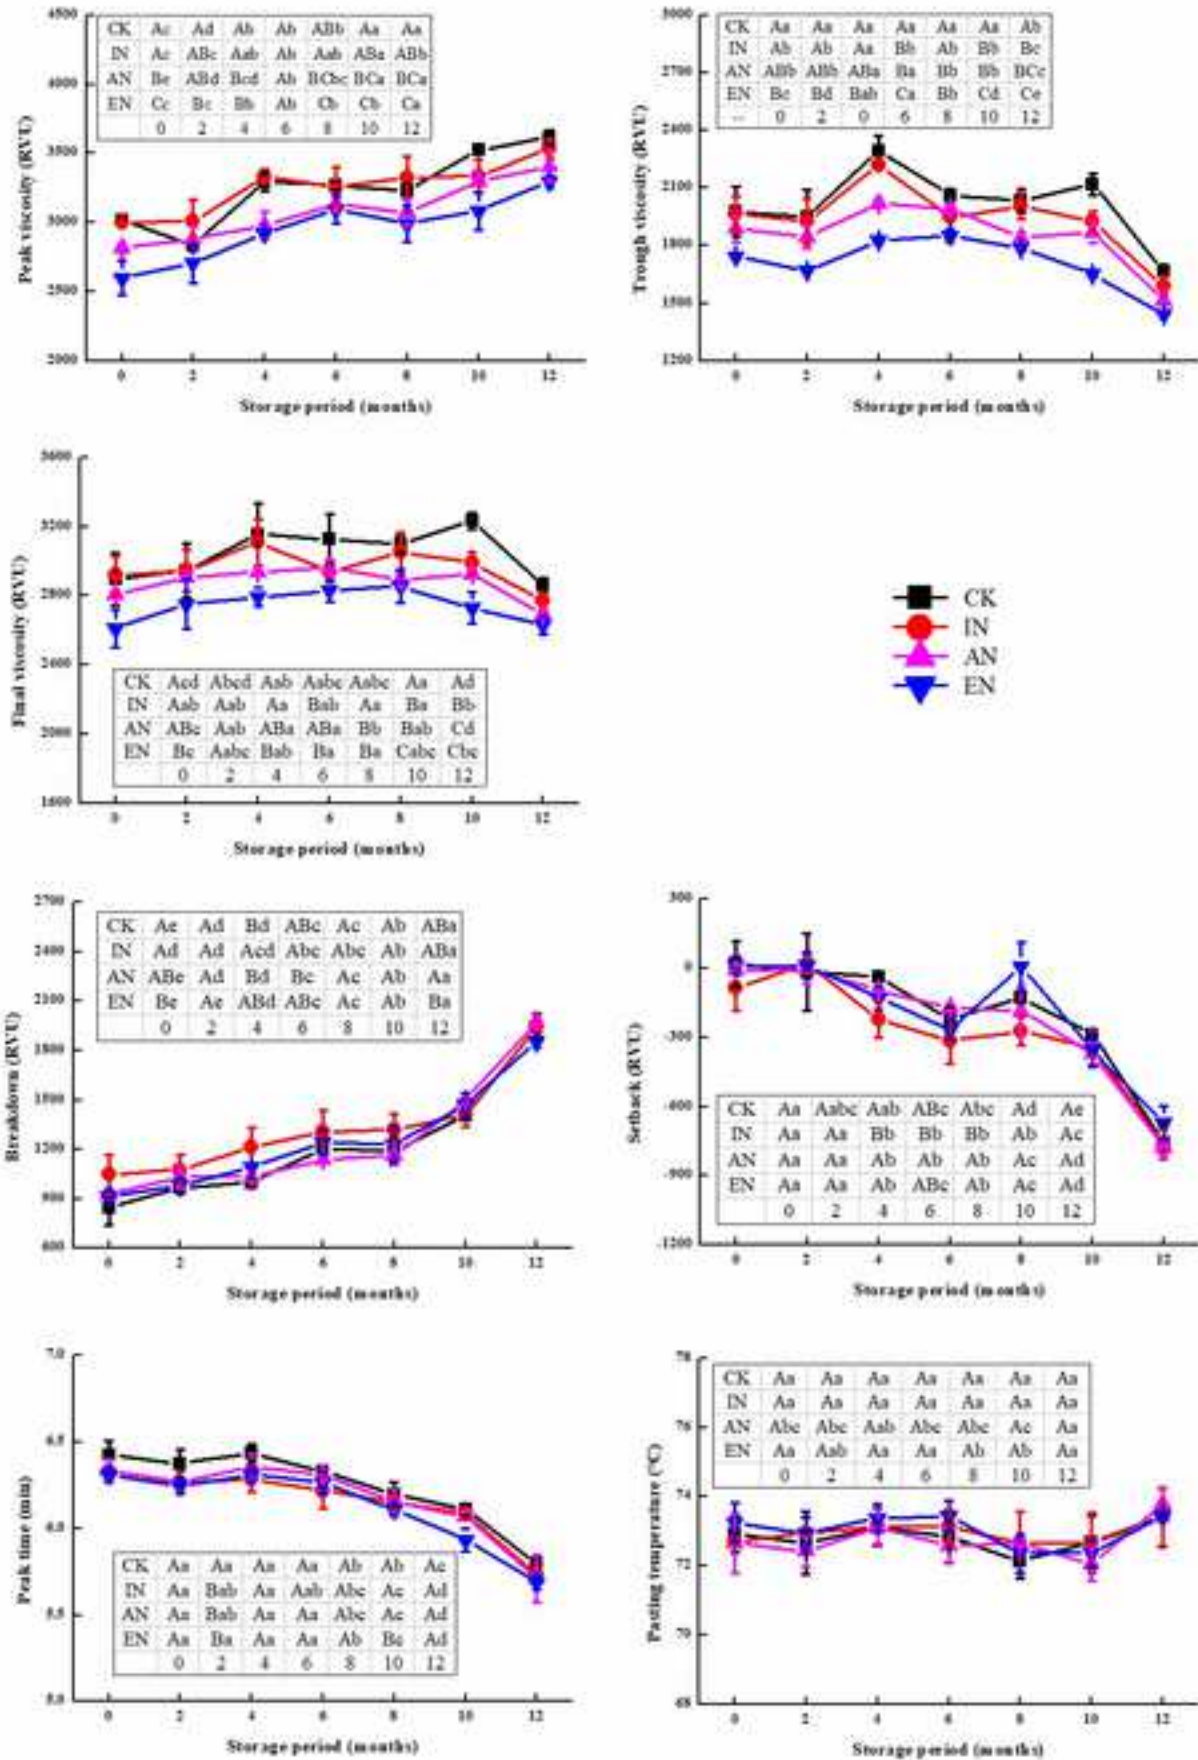

Dear Editor and reviewers,

We wish to express our gratitude to the three reviewers for their professional opinions and suggestions. However, after carefully going through the reviewers' comments, we found that a few questions mentioned by the reviewers were based on the field of agronomy and crop production. Although the present study involves the application of nitrogen in the field, we mainly focused on the differences of eating quality changes during storage due to the different quality of raw materials. Nitrogen fertilizer was applied at different rates only to obtain the raw materials with different qualitative characteristics. The research topic of this paper is pertinent to the field of food science, which may be one of the reasons why the reviewers did not approve of the study. Further, we believe that the research topic of this article is suitable for your journal. Hence, we wish to resubmit the article to your journal, hoping that you will give us another chance to get the article reviewed and published. We also hope that experts from the field of food science will be invited to review the article. Finally, based on the opinions and suggestions of the three reviewers, we have made various modifications to the manuscript. The queries of the three reviewers have been answered as follows:

Reviewer #1: Title: It seems to me that title should changes like as,

**1. "Nitrogen fertilizer and storage time impacts on cooking and eating quality of rice".**

We thank the reviewer for their suggestion. However, this paper mainly focuses on the effect of nitrogen application rate on the change of eating quality of rice during storage. Nitrogen application is the treatment in the field before rice harvest, and storage time is the treatment condition during storage after rice harvest. If the two phrases are placed parallelly, as in the suggested title, it may not convey our intended meaning. Thus, we think that it will be more appropriate to use the original title.

Abstract:

**2. Line 34 & 35: For the first time need use the elaborate terms of CK, IN, AN, EN etc. then use abbreviation in the whole text.**

We apologize for our negligence on this issue. We have now changed the sentence as follows: "In the present study, the eating and cooking quality of rice treated with 0 (CK), 160 (IN), 260 (AN), and 420 (EN) kg N/ha over 12 months of storage was investigated." has been changed to "The eating and cooking quality (ECQ) of rice treated with 0 (CK, control, 160 (IN, insufficient nitrogen), 260 (AN, adequate nitrogen), and 420 (EN, excessive nitrogen) kg N/ha were analyzed over 12 months of storage." at the Line 25 & 27.

**3. Line 37: The first words of any sentences need to avoid the use of abbreviation.**

We are very sorry for this issue. We have now changed the original sentence to "Results showed that the rate of nitrogen fertilizer application had no significant impact on the taste value after storage. However, EN application significantly increased the hardness ( $P < 0.05$ ) and reduced the gumminess of rice ( $P < 0.05$ ), and delayed the decline in the viscosity of rice paste by two months." at the Line 27 & 31.

---

**4. Line 43 & 45: Express the same thing. It is better to compile both of the two sentences.**

We have made the correction according to the reviewer's comment, and have deleted some content from the sentences, "During storage, the ratio of protein/amylose showed a significant negative correlation with taste value, springiness, cooking time, and water uptake. In rice with the nitrogen treatments, the ratio of protein/amylose showed a significant negative correlation with peak viscosity, trough viscosity, and setback."

**5. Line 47 & 48: Need to re-write. Need to improve the write-up.**

We have re-written this part according to the reviewer's suggestion, and have changed the statement "EN had both positive and negative effects on the rice quality during storage. Further investigation is needed to elucidate the mechanism of the changes in rice eating quality during storage." to "It was demonstrated that a rational nitrogen application rate (0–260 kg N/ha) for rice cultivation is particularly important to obtain high ECQ, but EN might be beneficial for the stability of the ECQ during storage." at the Line 32 & 34.

**6. Keywords: It is better to use only "Nitrogen".**

We have changed the phrase from "Nitrogen fertiliser application" to "Nitrogen".

Introduction:

**7. If use the spelling fertiliser, then everywhere use the same. But I think it is better to use the spelling "Fertilizer" in the whole text.**

We thank the reviewer for their suggestion. We have now changed all instances of the word "fertiliser" to "fertilizer" following American English conventions.

**8. Line 59: check the grammar of this sentence.**

We are very sorry for the issues associated with language. Since we have now rewritten the whole introduction according to the suggestions by other reviewers, we have deleted the sentence, "the main reasons for this negative effect are the increased protein content and decreased amylose content of rice [2] produced by application of nitrogen."

Materials and methods:

**9. Line 82, 83, 86 & 87: Need to re-write these sentences.**

We have rewritten this part according to the other reviewer's suggestions, and have changed it to "The following treatment groups were set up for our studies: a control (CK) group without nitrogen treatment (0 kg N/ha), and three treatment groups with insufficient (IN; 160 kg N/ha), adequate (AN; 260 kg N/ha), and excessive (EN; 420 kg N/ha) nitrogen, based on the typical nitrogen fertilization of 260 kg N/ha used by local farmers. Except for the nitrogen application rates, standard rice cultivation procedures were followed as done by the local farmers. The rice variety was Yanfeng 47, which is one of the main local varieties. The seeds were transplanted on May 25, and harvested on October 8 in 2018." at the Line 77 & 87.

Results and discussion:

**10. Please check the terms "gumminess", "trough viscosity", "setback" is appropriate for the**

**rice scientists!!**

We thank the reviewer for pointing this out. We have explained the meanings of these terms, and have inserted relevant references. For example, the following statements have been added:

“The texture of the rice cakes (hardness, gumminess, and springiness, defined for instrumental texture analyses in the study by Champagne et al. [1]) was determined with the Texture Analyzer (Brookfield Engineering Laboratories, MA, US) according to Zhang et al. [2].” at the Line 109 & 111.

“The pasting parameters of milled rice flour, such as peak viscosity, trough viscosity, breakdown, final viscosity, setback, peak time, and pasting temperature (Fig 2), were determined with a rapid viscosity analyzer (RVA-4, Newport Scientific, Australia).” at the Line 133 & 134 and the Line 138 & 139.

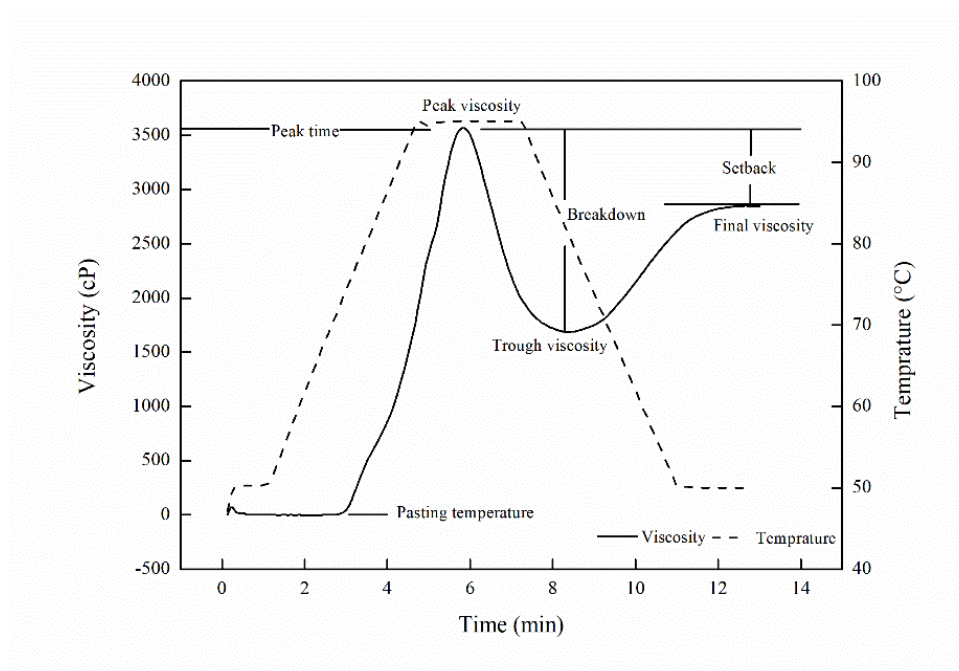

**Fig 2. RVA profile of milled rice flour.**

**11. Line 157 & 158: Delete this table. Because table 1 is not appropriate where as, except 3 all are ns. It is better to express this in a sentence.**

Considering the reviewer’s suggestion, we have deleted Table 1, and have added the following sentences to express this: “Among the ECQ indices evaluated, nitrogen application rates and storage time only showed significant interaction effects on gumminess, trough viscosity, and setback ( $p < 0.05$ ; data not shown), indicating that nitrogen application rate has a significant impact the ECQ of rice during postharvest storage. Thus, controlling the nitrogen application rate in the fields is important for maintaining the ECQ of rice during storage.” at the Line 150 & 154.

---

**12. Table 2: Need to add the footnote for clarify the terms.**

Considering the reviewer's suggestion, we have changed the Table 2 to the Figure 4. And we have now added the footnote to clarify the terms as follows: "CK, control group (0 kg N/hm<sup>2</sup>); IN, insufficient nitrogen (160 kg N/hm<sup>2</sup>); AN, adequate nitrogen (260 kg N/hm<sup>2</sup>); EN, excessive nitrogen (420 kg N/hm<sup>2</sup>). For each parameter, the mean values of three replicates  $\pm$  standard deviation followed by different lowercase letters in the same column differ significantly as per Duncan's test ( $P < 0.05$ ) as a function of storage time. Different uppercase letters in the rows denote significant differences as per Duncan's test ( $P < 0.05$ ) as a function of different nitrogen application rates." the Line 227 & 233.

Conclusion:

**13. It should be necessary for the expression at a glance for the nitrogen application rate and storage time effect on rice quality. It is also necessary to focus on the output of the whole experiment.**

We have now rewritten this part according to the reviewer's suggestion, reorganized the structure, and highlighted the important conclusion for this part as follows: "To our knowledge, this is the first report on the effect of nitrogen fertilizer levels on rice quality during storage. Results showed that excessive nitrogen application significantly increased the hardness, and reduced the gumminess during late storage. AN and EN applications delayed the change in the viscosity of rice paste. In addition, during storage, the protein/amylose ratio showed a better correlation to the ECQ of rice than the protein or amylose contents alone. The results demonstrated that fertilizer application rate affected the quality of the agricultural product during storage by influencing the initial quality of the raw material. Hence, more attention should be paid to the effects of pre-harvest field fertilization on the quality changes of agricultural products during storage, so as to better ensure the high-quality of agricultural products from the field to the plate." at the Line 310 & 320.

**14. Overall comments: This manuscript English language is poor. It is better to improve the presentation of total English language.**

Considering the reviewer's suggestion, the article has been proofread and edited by "Editage" after revision, to address any issues associated with language.

We express our thanks for your helpful comments.

Reviewer #2:

The manuscript presents a research study on the impact of nitrogen application at different doses on rice cooking time and nutritional quality which is/could be an interesting topic to focus on in East and south Asia and sub-Saharan Africa but:

---

**1. The introduction is very poor and does not expose really the problematic, no questions to answer, no assessment of previous studies performed targeting the same subject, no bibliography, etc.**

We have now rewritten the introduction according to the reviewer's suggestion, and added statements focusing on the importance, relevant research progress, and existing problems for controlling the deterioration of rice quality during storage. We have also explained how nitrogen application can change the initial quality of rice, which may affect the rice quality during storage, and have added relevant references. The revised statements are as follows at the Line 39 & 73 :

“Rice, as a staple food, plays an important role in human diet, and is usually stored for years to meet the needs of people owing to its seasonal growth. However, many studies have reported that the storage process may result in the deterioration of the palatability of rice, including increased hardness and reduced viscosity [3]. Furthermore, the cooking and gelatinization characteristics may be changed, including increase in water absorption, volume expansion rate, cooking time, and setback, as well as a certain decrease in trough viscosity, final viscosity, and breakdown [4]. This deterioration is mostly considered to be related to changes in the interactions between the proteins and starch within the rice grain [5-9].

Numerous efforts have been made in recent years to reduce the deterioration of rice quality due to storage. Low temperature and humidity [10, 11], as well as vacuum or nano packaging [12] have proven to be beneficial in maintaining rice quality during storage. The methods have been applied in the storage of milled rice, which has a high commodity price, but not in rice paddy storage owing to the trade-off between the high cost of the storage method and the relatively low commodity value of rice paddy, which is also the reason why rice paddy is usually stored under natural conditions. To date, no feasible solution to the problem of quality loss during rice paddy storage is available. Except for storage conditions, the initial quality of rice is also a key factor for the end-use quality of rice after storage. Fertilization is important for the establishment of the initial quality of rice, especially the rate of nitrogen application. It is well-documented that nitrogen fertilizers have a prominent effect on the eating and cooking quality (ECQ) of rice [13], mainly due to the increased protein content and decreased amylose content of rice [14] resulting from nitrogen application, which causes an increase in the hardness of rice, decreasing its palatability [15-17], and also alters the rice gelatinization characteristics and cooking quality.

The effect of nitrogen application rate on the quality of fresh rice is well known, but whether this effect persists after a period of storage is still unclear. Previous studies have indicated that fertilization has certain effects on the quality of tomato and potato during storage [18, 19]. However, there are no reports addressing whether different nitrogen fertilization levels affect rice quality during storage. In this study, we explored the dynamic changes in the ECQ after storing rice produced using different nitrogen application rates, and discussed the likely reasons behind the variations in ECQ after storage, with the objective of providing a theoretical basis for the production and quality-control of high-quality rice from the field to the table.”

---

**2. The materials and methods section are not well organized;**

**Nothing was mentioned on the materials, what kind of germplasm (released varieties, cultivars, advanced lines, ...)**

We apologize for our negligence on this issue. We have now added the relevant statement in the “Materials and methods” section to indicate the rice variety, as follows: “The rice variety was Yanfeng 47, which is one of the main local varieties. The seeds were transplanted on May 25, and harvested on October 8 in 2018.” at the Line 85 & 87.

**3. The different nitrogen fertilizer treatments were adjusted based on the farmer’s fertilization rate (which farmer, small or big farmers) and this should not be the case. The treatments should be defined based on the optimal recommended rate (i.e. 0, 50%, 100%, 150%, 200%). As reported in previous studies the economically optimum and ecologically optimum N rates in Asia were estimated to 180–285 kg/ha and 90–150 kg/ha, respectively. Which reference did the authors used and why?**

We thank the reviewer for their queries and suggestions. In our opinion, the soil characteristics in different regions within the same province may differ significantly due to the vast area, resulting in different appropriate levels of nitrogen fertilizer for different areas. The field experiment in our study was conducted in Panjin area of the Liaoning Province, located in the Liaohe River Basin, which is one of the main areas for producing rice in China. The nitrogen application rate was based on the local traditional conventional nitrogen application rate of 260 N kg/ha (100%). According to the design principle of threshold experiment, 160 N kg/ha was set as the low nitrogen group (60%), 420 kg N/ha was the high nitrogen group (160%), and no nitrogen treatment acted as the control group (0%). We have added the following statements in the “Materials and methods” section to indicate this: “The following treatment groups were set up for our studies: a control (CK) group without nitrogen treatment (0 kg N/ha), and three treatment groups with insufficient (IN; 160 kg N/ha), adequate (AN; 260 kg N/ha), and excessive (EN; 420 kg N/ha) nitrogen, based on the typical nitrogen fertilization of 260 kg N/ha used by local farmers.” at the Line 81 & 84.

**4. For cooking time normally and the best way to do with a relatively better precise data you should use a mattson cooker.**

We express our deepest thanks to the reviewer for their advice. The Mattson cooker is indeed a very good instrument for measuring cooking time. We will consider using this instrument in future experiments. Although we did not use a Mattson cooker to determine the cooking time of rice, our method of estimation was based on a number of previous reports, such as Gujral and Kumar [20], Ziegler et al. [21], and Cui et al. [22]. We also hope to compare our conclusion with other studies.

• Results and discussion

**5. Results are not very well presented and structured,**

**Results presented and the discussion are not balanced. It will better for the authors to present the results and discussion in two separate sections,**

We have now rewritten this part according to the reviewer’s suggestion. Although we did not divide the results and discussion into two parts, we restructured this part to reorganize the narrative logic of the results, focusing on the integrity of the chain of proof.



---

**6. It could/would be better if the authors could include yield and attributes to the quality traits, this may give more importance to the study**

We acknowledge the reviewer's suggestion. However, we wish to reiterate that in this study, we only assessed the effects of nitrogen fertilization rate during cultivation on the quality of rice following postharvest storage. As the research was mainly conducted from the perspective of food science, we did not include the yield, quality attributes, and other such indicators.

**7. Nitrogen application is a determinant practice for seed yield in rice production, how can the authors justify the low seed production under low N? Nowadays, there is more emphasis on high nutritional quality ag. products including high protein content, iron, and zinc. How can the authors justify the low protein content under low N?**

We appreciate the reviewer's concern. Although low nitrogen treatment was unfavorable for rice nutritional quality, such as protein content, low nitrogen treatment was helpful in maintaining the eating quality. Therefore, this study employed a low nitrogen treatment group. As this study mainly focuses on the effect of nitrogen application rate on the quality of rice after storage, the effect of low nitrogen treatment is worth investigating.

**8. The manuscript is not well written and structured in the different sections. The study remains of interest but should be completed with some agronomic traits mainly seed yield and attributes. Taking this into consideration the manuscript with the non-innovative results presented cannot be for publication in PLOS ONE journal.**

L63: Storage, as one of the main practices of rice after harvest, has a negative (or positive) impact on the .....

L69-70: ..... during storage is called aging which is mostly related to changes in the protein and starch contents of rice and their .....

L179-184: there is a fig1. caption without the figure

We thank the reviewer for their comment. In order to address the language-related issues mentioned above, we have revised the logical order of the whole introduction. For details, please refer to the response to Comment #1 by the first reviewer.

L179-184 is the annotation for Fig 1. We have now added the image of Fig 1.

However, we did not add the yield and other similar attributes, because this study focuses on the effect of nitrogen application rate on the eating quality of rice after storage, mainly from the perspective of food quality, as stated previously.

---

Reviewer #3: The title of this manuscript is interesting, and the work can do help to improve rice quality by field management and the storage. Some important data must to be added :

**1. The environment of paddy rice growth, the plant time and harvest time, the site of experiment including Longitude and latitude, and the information of soil , especially the nitrogen concentration should be added.**

We are grateful to the reviewer for their helpful suggestions. We have now added the following details to the “Materials and methods” section: “The experiment was conducted at Liaohe Delta, Panjin, China (122°14'17"N, 41°9'31"E). The physical and chemical properties of the 0–20 cm soil were as follows: pH 8.2, organic matter 22.57 g/kg, total nitrogen 1.42 g/kg, alkali nitrogen 105.24 mg/kg, available phosphorus 21.61 mg/kg, available potassium 164.22 mg/kg, and bulk density 1.39 g/cm<sup>3</sup>.” at the Line 77 & 80.

**2. The varieties need to introduce, elite rice variety or common rice variety? the planting density is also to be described clearly.**

We appreciate the suggestion by the reviewer. We have now added the following details to the “Materials and methods” section: “The rice variety was Yanfeng 47, which is one of the main local varieties. The seeds were transplanted on May 25, and harvested on October 8 in 2018.” at the Line 85 & 87.

**3. The condition of rice seeds storage is very important in this work, the authour must deribe the storing condition accuratly and clearly instead of "stored under laboratory conditions".**

As suggested by the reviewer, the condition of rice paddy storage was very important in this work. Thus, we have now added the following details in the “Materials and methods” section: “The temperature and humidity conditions in the laboratory were recorded periodically, as shown in Fig 1.

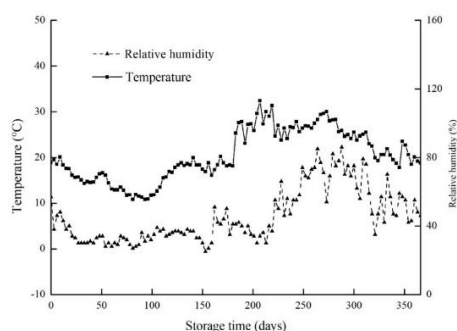

**Fig 1. Record of temperature and relative humidity in the laboratory during the experimental period from November 2018 to November 2019.**

**4. The nitrogen concentration of rice seeds need to be investigated before rice storing.**

We appreciate the comment by the reviewer. As this study mainly focuses on the effect of nitrogen application rate on the eating quality of rice following storage, and does not investigate the effect of nitrogen application rate on the concentration of nitrogen in the grain or the nitrogen utilization

---

rate in rice, we adhered to the problems in the purview of food science. Therefore, the concentration of nitrogen in rice before storage was not determined.

#### **5. Poor discussion and conclusion need to rewrite.**

The “Results and discussion” and “Conclusions” sections have been rewritten.

#### **6. Whether Capital letter or lowercase describe in tables and figures?**

The capital letters represent the differences between nitrogen fertilizer treatment groups, and lowercase letters represent the differences between the treatment groups at different storage times. We have re-annotated the chart accordingly.

We thank you again for your time, and hope that you will find the article to be modified suitably, and accept it for publication soon.

Sincerely,  
Hanling liang

#### References

1. Champagne ET, Bett KL, Vinyard BT, McClung AM, Barton FE, Moldenhauer K, et al. Correlation between cooked rice texture and rapid visco analyser measurements. *Cereal Chem.* 1999;76(5):764-71.
2. Zhang N, Wen YY, Yan S, Mao HJ, Lei NY, Li HY, et al. The increased stickiness of non-glutinous rice by alkali soaking and its molecular causes. *Int J Biol Macromol.* 2019;135:394-9. doi: 10.1016/j.ijbiomac.2019.05.184. PubMed PMID: WOS:000477691600043.
3. National Health and Family Planning Commission of China; National food safety standards. Determination of moisture in food. 2016;GB 5009.3-2016.
4. Keawpeng I, Venkatachalam K. Effect of aging on changes in rice physical qualities. *Int Food Res J.* 2015;22(6):2180-7. PubMed PMID: WOS:000422964900001.
5. Chrastil J. Protein-starch interactions in rice grains. Influence of storage on oryzenin and starch. *J Agric Food Chem.* 1990;38(9):1804-9.
6. Patindol J, Wang YJ, Jane JI. Structure-functionality changes in starch following rough rice storage. *Starch-Stärke.* 2005;57(5):197-207.
7. Huang Y-C, Lai H-M. Characteristics of the starch fine structure and pasting

- 
- properties of waxy rice during storage. *Food Chem.* 2014;152:432-9. doi: 10.1016/j.foodchem.2013.11.144. PubMed PMID: WOS:000332132300060.
8. Guo YB, Cai WR, Tu K, Wang SM, Zhu XL. Key Proteins Causing Changes in Pasting Properties of Rice During Aging. *Cereal Chem.* 2015;92(4):384-8. doi: 10.1094/cchem-05-14-0104-r. PubMed PMID: WOS:000360818900007.
  9. Zhou Z, Robards K, Helliwell S, Blanchard C. Effect of rice storage on pasting properties of rice flour. *Food Res Int.* 2003;36(6):625-34.
  10. Genkawa T, Uchino T, Inoue A, Tanaka F, Hamanaka D. Development of a low-moisture-content storage system for brown rice: Storability at decreased moisture contents. *Biosystems Engineering.* 2008;99(4):515-22.
  11. Park CE, Kim YS, Park KJ, Kim BK. Changes in physicochemical characteristics of rice during storage at different temperatures. *Journal of Stored Products Research.* 2012;48(48):25-9.
  12. Wang F, Hu Q, Mariga AM, Cao C, Yang W. Effect of nano packaging on preservation quality of Nanjing 9108 rice variety at high temperature and humidity. *Food Chem.* 2018;239:23-31. doi: 10.1016/j.foodchem.2017.06.082. PubMed PMID: WOS:000408740200004.
  13. Kaur A, Ghumman A, Singh N, Kaur S, Viridi AS, Riar GS, et al. Effect of different doses of nitrogen on protein profiling, pasting and quality attributes of rice from different cultivars. *J Food Sci Technol.* 2016;53(5):2452-62. doi: 10.1007/s13197-016-2230-z. PubMed PMID: 27407212; PubMed Central PMCID: PMC4921099.
  14. Cao XM, Sun HY, Wang CG, Ren XJ, Liu HF, Zhang ZJ. Effects of late-stage nitrogen fertilizer application on the starch structure and cooking quality of rice. *J Sci Food Agric.* 2017;98(6):2332-40. Epub 2340. doi: 10.1002/jsfa.8723.
  15. Zhu DW, Zhang HC, Guo BW, Xu K, Dai QG, Wei HY, et al. Effects of nitrogen level on yield and quality of japonica soft super rice. *J Integr Agric.* 2017;16(5):1018-27. doi: 10.1016/s2095-3119(16)61577-0.
  16. Singh N, Pal N, Mahajan G, Singh S, Shevkani K. Rice grain and starch properties: Effects of nitrogen fertilizer application. *Carbohydr Polym.* 2011;86(1):219-25. doi: 10.1016/j.carbpol.2011.04.039.
  17. Champagne ET, Bett-Garber KL, Thomson JL, Fitzgerald MA. Unraveling the impact of nitrogen nutrition on cooked rice flavor and texture. *Cereal Chem.* 2009;86(3):274-

---

80. doi: 10.1094/CCHEM-86-3-0274.

18. Unlu H, Unlu HO, Karakurt Y, Padem H. Organic and conventional production systems, microbial fertilization and plant activators affect tomato quality during storage. *Afr J Biotechnol.* 2010;9(46):7909-14. PubMed PMID: WOS:0002844481800020.
19. Makani MN, Sargent SA, Zotarelli L, Huber DJ, Sims CA. Harvest Interval Has Greater Effect on Periderm Maturity and Storage Quality of Early-maturing, Tablestock Potato than Nitrogen Rate. *HortScience: a publication of the American Society for Horticultural Science.* 2017;52(10):1390-5.
20. Gujral HS, Kumar V. Effect of accelerated aging on the physicochemical and textural properties of brown and milled rice. *J Food Eng.* 2003;59(2-3):117-21.
21. Ziegler V, Ferreira CD, Hoffmann JF, Chaves FC, Vanier NL, De MO, et al. Cooking quality properties and free and bound phenolics content of brown, black, and red rice grains stored at different temperatures for six months. *Food Chem.* 2018.
22. Cui L, Pan Z, Yue T, Atungulu GG, Berrios J. Effect of Ultrasonic Treatment of Brown Rice at Different Temperatures on Cooking Properties and Quality. *Cereal Chem.* 2010;87(5):403-8. doi: 10.1094/cchem-02-10-0034.
